# Supplementary material for: Mucosal and Systemic Immune Responses to Salmon Gill Poxvirus Infection in Atlantic Salmon Are Modulated Upon Hydrocortisone Injection
Source: PubMed Central journal article supplement (PMC8221106; doi:10.3389/fimmu.2021.689302), 2021-06-09

# Bioanalyzer - Gel Report for SGPV qPCR assays

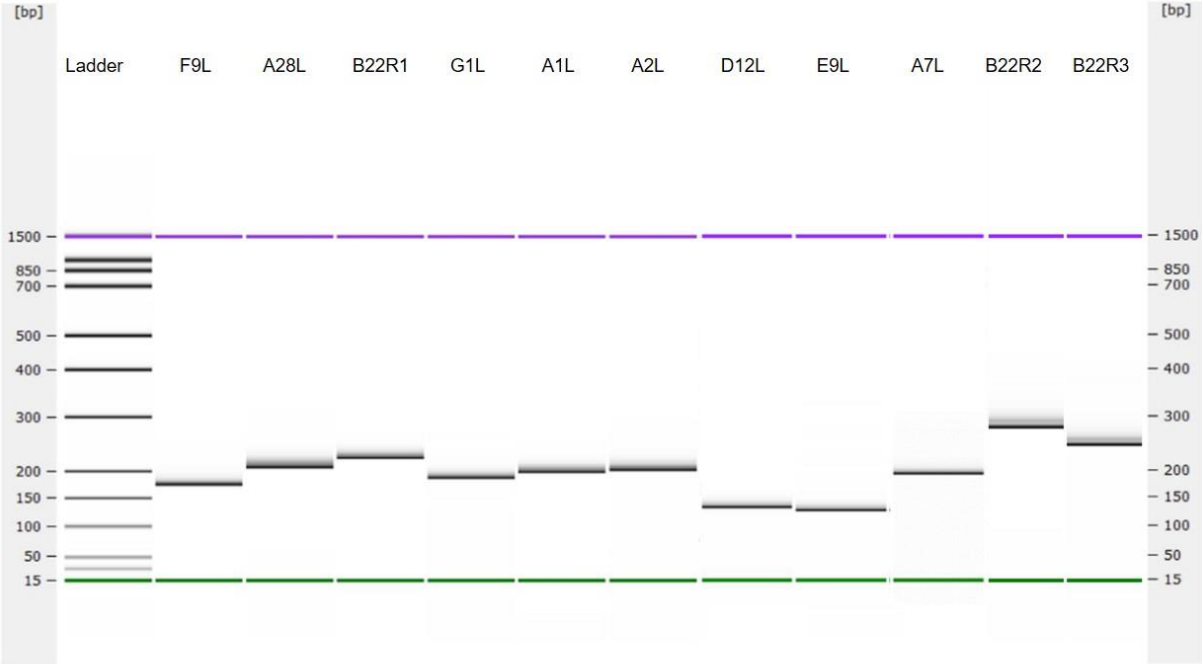

Supplement: Image_1.pdf [file Image_1.pdf]
