# Supplementary material for: Mucosal and Systemic Immune Responses to Salmon Gill Poxvirus Infection in Atlantic Salmon Are Modulated Upon Hydrocortisone Injection
Source: PubMed Central journal article supplement (PMC8221106; doi:10.3389/fimmu.2021.689302), 2021-06-09

# ***In situ* hybridization with probes targeting B22R1 and D13L**

**RNAscope 2.5 HD Detection kit – RED**

L53, 1 DPE, RNAscope probe: B22R1 (ct - 33,4):

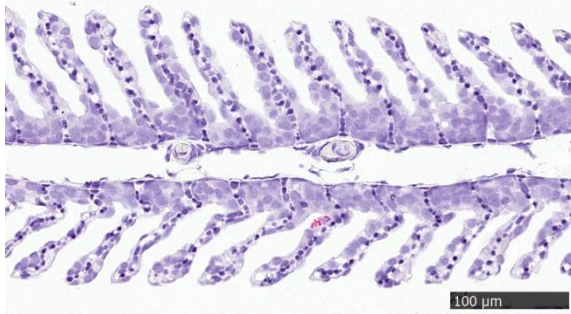

L53, 1 DPE, RNAscope probe: D13L (ct - 37,3):

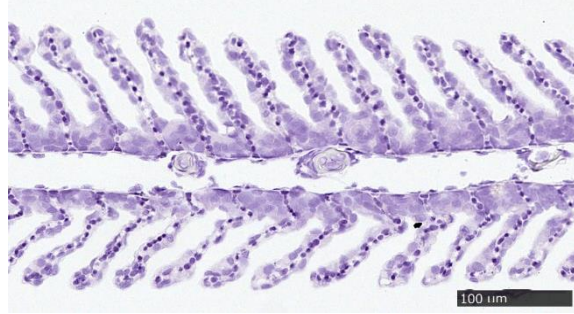

L54, 1 DPE, RNAscope probe: B22R1 (ct - 31,1):

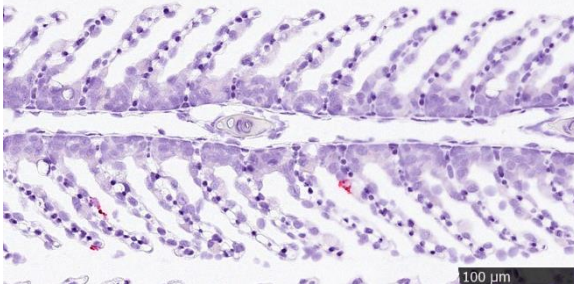

L54, 1 DPE, RNAscope probe: D13L (ct - 35,9):

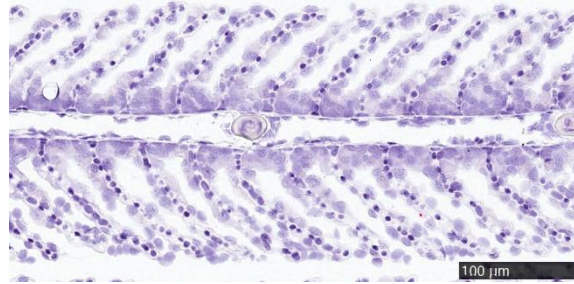

L55, 1 DPE, RNAscope probe: B22R1 (ct - 30,4):

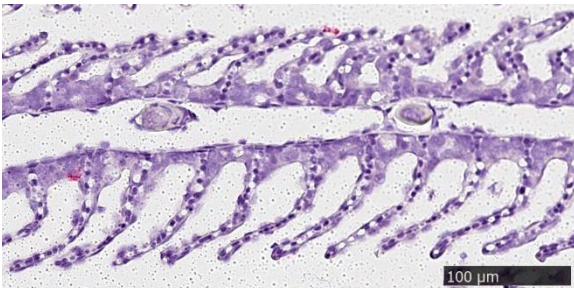

L53, 1 DPE, RNAscope probe: D13L (ct - 34,6):

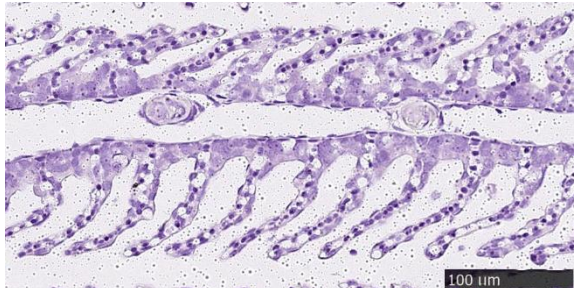

L77, 3 DPE, RNAscope probe: B22R1 (ct - 28,6):

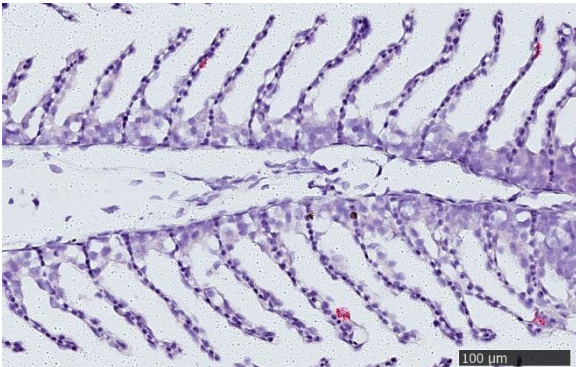

L77, 3 DPE, RNAscope probe: D13L (ct - 24,7):

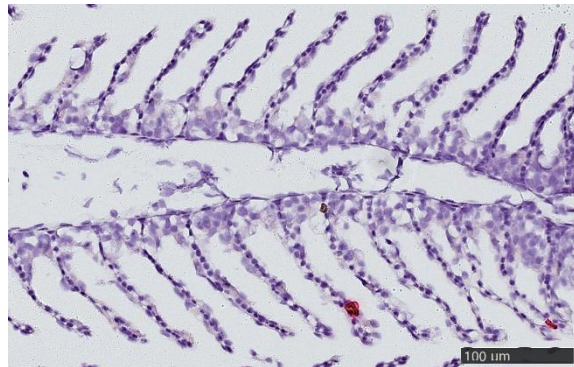

Supplement: Image_3.pdf [file Image_3.pdf]
