# Supplementary material for: Mucosal and Systemic Immune Responses to Salmon Gill Poxvirus Infection in Atlantic Salmon Are Modulated Upon Hydrocortisone Injection
Source: Front Immunol. 2021 Jun 9;12:689302. doi: 10.3389/fimmu.2021.689302 (PMC8221106; doi:10.3389/fimmu.2021.689302)
Supplement: Supplementary file 9 [file Table_4.xlsx]

## Sheet: Ct - EF1a
Target	Sample	Group	DPE	Biological Set Name	Cq (EF1a)	Cq Mean (EF1a)		Difference from mean
Ef1a	43	C.S	1	Spleen	20.75
Ef1a	43	C.S	1	Spleen	20.85	20.8		1.03785		Cq EF1a (mean): 19,7621502
Ef1a	44	C.S	1	Spleen	20.16					Cut of: 1,5
Ef1a	44	C.S	1	Spleen	20.49	20.325		0.56285
Ef1a	45	C.S	1	Spleen	19.77
Ef1a	45	C.S	1	Spleen	20.04	19.905		0.14285
Ef1a	46	C.S	1	Spleen	19.74
Ef1a	46	C.S	1	Spleen	19.65	19.695		0.0671502
Ef1a	47	C.S	1	Spleen	20.07
Ef1a	47	C.S	1	Spleen	19.96	20.015		0.25285
Ef1a	48	C.H	1	Spleen	22.69
Ef1a	48	C.H	1	Spleen	22.82	22.755		2.99285
Ef1a	49	C.H	1	Spleen	20.06
Ef1a	49	C.H	1	Spleen	20.17	20.115		0.35285
Ef1a	50	C.H	1	Spleen	20.51
Ef1a	50	C.H	1	Spleen	20.27	20.39		0.62785
Ef1a	51	C.H	1	Spleen	19.85
Ef1a	51	C.H	1	Spleen	19.85	19.85		0.0878498
Ef1a	52	C.H	1	Spleen	19.82
Ef1a	52	C.H	1	Spleen	20.29	20.055		0.29285
Ef1a	53	E.S	1	Spleen	19.38
Ef1a	53	E.S	1	Spleen	19.85	19.615		0.14715
Ef1a	54	E.S	1	Spleen	19.99
Ef1a	54	E.S	1	Spleen	19.58	19.785		0.0228498
Ef1a	55	E.S	1	Spleen	20.33
Ef1a	55	E.S	1	Spleen	20.05	20.19		0.42785
Ef1a	56	E.S	1	Spleen	19.56
Ef1a	56	E.S	1	Spleen	19.83	19.695		0.0671502
Ef1a	57	E.S	1	Spleen	20.58
Ef1a	57	E.S	1	Spleen	19.65	20.115		0.35285
Ef1a	58	E.H	1	Spleen	19.93
Ef1a	58	E.H	1	Spleen	19.84	19.885		0.12285
Ef1a	59	E.H	1	Spleen	20.32
Ef1a	59	E.H	1	Spleen	19.97	20.145		0.38285
Ef1a	60	E.H	1	Spleen	20.01
Ef1a	60	E.H	1	Spleen	19.41	19.71		0.0521502
Ef1a	61	E.H	1	Spleen	20.06
Ef1a	61	E.H	1	Spleen	19.73	19.895		0.13285
Ef1a	62	E.H	1	Spleen	19.57
Ef1a	62	E.H	1	Spleen	19.5	19.535		0.22715
Ef1a	63	C.S	3	Spleen	19.52
Ef1a	63	C.S	3	Spleen	19.3	19.41		0.35215
Ef1a	64	C.S	3	Spleen	19
Ef1a	64	C.S	3	Spleen	19.35	19.175		0.58715
Ef1a	65	C.S	3	Spleen	19.25
Ef1a	65	C.S	3	Spleen	19.9	19.575		0.18715
Ef1a	66	C.S	3	Spleen	20.68
Ef1a	66	C.S	3	Spleen	20.89	20.785		1.02285
Ef1a	67	C.S	3	Spleen	19.44
Ef1a	67	C.S	3	Spleen	19.89	19.665		0.0971502
Ef1a	68	C.H	3	Spleen	19.76
Ef1a	68	C.H	3	Spleen	19.99	19.875		0.11285
Ef1a	69	C.H	3	Spleen	19.51
Ef1a	69	C.H	3	Spleen	19.42	19.465		0.29715
Ef1a	70	C.H	3	Spleen	21.86
Ef1a	70	C.H	3	Spleen	22.11	21.985		2.22285
Ef1a	71	C.H	3	Spleen	19.75
Ef1a	71	C.H	3	Spleen	19.78	19.765		0.0028498
Ef1a	72	C.H	3	Spleen	19.59
Ef1a	72	C.H	3	Spleen	19.35	19.47		0.29215
Ef1a	73	E.S	3	Spleen	19.6
Ef1a	73	E.S	3	Spleen	19.4	19.5		0.26215
Ef1a	74	E.S	3	Spleen	19.56
Ef1a	74	E.S	3	Spleen	19.13	19.345		0.41715
Ef1a	75	E.S	3	Spleen	19.66
Ef1a	75	E.S	3	Spleen	19.6	19.63		0.13215
Ef1a	76	E.S	3	Spleen	22.14
Ef1a	76	E.S	3	Spleen	22.32	22.23		2.46785
Ef1a	77	E.S	3	Spleen	19.7
Ef1a	77	E.S	3	Spleen	19.9	19.8		0.0378498
Ef1a	78	E.H	3	Spleen	20.02
Ef1a	78	E.H	3	Spleen	20.26	20.14		0.37785
Ef1a	79	E.H	3	Spleen	20.83
Ef1a	79	E.H	3	Spleen	20.63	20.73		0.96785
Ef1a	80	E.H	3	Spleen	19.23
Ef1a	80	E.H	3	Spleen	19.29	19.26		0.50215
Ef1a	81	E.H	3	Spleen	19.69
Ef1a	81	E.H	3	Spleen	19.18	19.435		0.32715
Ef1a	82	E.H	3	Spleen	19.75
Ef1a	82	E.H	3	Spleen	19.44	19.595		0.16715
Ef1a	83	C.S	7	Spleen	20
Ef1a	83	C.S	7	Spleen	19.92	19.96		0.19785
Ef1a	84	C.S	7	Spleen	19.31
Ef1a	84	C.S	7	Spleen	19.35	19.33		0.43215
Ef1a	85	C.S	7	Spleen	19.27
Ef1a	85	C.S	7	Spleen	19.51	19.39		0.37215
Ef1a	86	C.S	7	Spleen	19.03
Ef1a	86	C.S	7	Spleen	19.1	19.065		0.69715
Ef1a	87	C.S	7	Spleen	19.06
Ef1a	87	C.S	7	Spleen	19.22	19.14		0.62215
Ef1a	88	C.H	7	Spleen	19.25
Ef1a	88	C.H	7	Spleen	19.37	19.31		0.45215
Ef1a	89	C.H	7	Spleen	19.33
Ef1a	89	C.H	7	Spleen	19.47	19.4		0.36215
Ef1a	90	C.H	7	Spleen	20.02
Ef1a	90	C.H	7	Spleen	19.7	19.86		0.0978498
Ef1a	91	C.H	7	Spleen	23.61
Ef1a	91	C.H	7	Spleen	23.42	23.515		3.75285
Ef1a	92	C.H	7	Spleen	19.88
Ef1a	92	C.H	7	Spleen	19.76	19.82		0.0578498
Ef1a	93	E.S	7	Spleen	19.07
Ef1a	93	E.S	7	Spleen	19.08	19.075		0.68715
Ef1a	94	E.S	7	Spleen	20.56
Ef1a	94	E.S	7	Spleen	20.28	20.42		0.65785
Ef1a	95	E.S	7	Spleen	18.7
Ef1a	95	E.S	7	Spleen	19	18.85		0.91215
Ef1a	96	E.S	7	Spleen	20.1
Ef1a	96	E.S	7	Spleen	20.13	20.115		0.35285
Ef1a	97	E.S	7	Spleen	21.02
Ef1a	97	E.S	7	Spleen	20.72	20.87		1.10785
Ef1a	98	E.H	7	Spleen	19.87
Ef1a	98	E.H	7	Spleen	19.31	19.59		0.17215
Ef1a	99	E.H	7	Spleen	19.44
Ef1a	99	E.H	7	Spleen	19.44	19.44		0.32215
Ef1a	100	E.H	7	Spleen	20.63
Ef1a	100	E.H	7	Spleen	20.51	20.57		0.80785
Ef1a	101	E.H	7	Spleen	18.93
Ef1a	101	E.H	7	Spleen	18.86	18.895		0.86715
Ef1a	102	E.H	7	Spleen	19.17
Ef1a	102	E.H	7	Spleen	18.99	19.08		0.68215
Ef1a	104	C.S	10	Spleen	18.8
Ef1a	104	C.S	10	Spleen	18.72	18.76		1.00215
Ef1a	105	C.S	10	Spleen	19.48
Ef1a	105	C.S	10	Spleen	19.34	19.41		0.35215
Ef1a	106	C.S	10	Spleen	19.29
Ef1a	106	C.S	10	Spleen	19.24	19.265		0.49715
Ef1a	107	C.S	10	Spleen	19.42
Ef1a	107	C.S	10	Spleen	19.72	19.57		0.19215
Ef1a	108	C.S	10	Spleen	19.67
Ef1a	108	C.S	10	Spleen	20.16	19.915		0.15285
Ef1a	109	C.H	10	Spleen	19.8
Ef1a	109	C.H	10	Spleen	19.55	19.675		0.0871502
Ef1a	110	C.H	10	Spleen	20.6
Ef1a	110	C.H	10	Spleen	20.48	20.54		0.77785
Ef1a	111	C.H	10	Spleen	19.34
Ef1a	111	C.H	10	Spleen	19.3	19.32		0.44215
Ef1a	112	C.H	10	Spleen	19.08
Ef1a	112	C.H	10	Spleen	19.13	19.105		0.65715
Ef1a	113	C.H	10	Spleen	19.11
Ef1a	113	C.H	10	Spleen	19.2	19.155		0.60715
Ef1a	114	E.S	10	Spleen	19.83
Ef1a	114	E.S	10	Spleen	19.2	19.515		0.24715
Ef1a	115	E.S	10	Spleen	19.62
Ef1a	115	E.S	10	Spleen	19.68	19.65		0.11215
Ef1a	116	E.S	10	Spleen	19.49
Ef1a	116	E.S	10	Spleen	19.65	19.57		0.19215
Ef1a	117	E.S	10	Spleen	19.3
Ef1a	117	E.S	10	Spleen	19.23	19.265		0.49715
Ef1a	118	E.S	10	Spleen	19.33
Ef1a	118	E.S	10	Spleen	19.38	19.355		0.40715
Ef1a	119	E.H	10	Spleen	18.81
Ef1a	119	E.H	10	Spleen	18.82	18.815		0.94715
Ef1a	120	E.H	10	Spleen	19.16
Ef1a	120	E.H	10	Spleen	19.41	19.285		0.47715
Ef1a	121	E.H	10	Spleen	19.06
Ef1a	121	E.H	10	Spleen	19.19	19.125		0.63715
Ef1a	122	E.H	10	Spleen	19.13
Ef1a	122	E.H	10	Spleen	19.38	19.255		0.50715
Ef1a	123	E.H	10	Spleen	19.87
Ef1a	123	E.H	10	Spleen	19.42	19.645		0.11715
Ef1a	124	C.S	14	Spleen	20.47
Ef1a	124	C.S	14	Spleen	20.79	20.63		0.86785
Ef1a	125	C.S	14	Spleen	20
Ef1a	125	C.S	14	Spleen	20.03	20.015		0.25285
Ef1a	126	C.S	14	Spleen	19.86
Ef1a	126	C.S	14	Spleen	19.74	19.8		0.0378498
Ef1a	127	C.S	14	Spleen	20.55
Ef1a	127	C.S	14	Spleen	20.65	20.6		0.83785
Ef1a	128	C.S	14	Spleen	19.47
Ef1a	128	C.S	14	Spleen	19.55	19.51		0.25215
Ef1a	129	C.H	14	Spleen	20.06
Ef1a	129	C.H	14	Spleen	20.21	20.135		0.37285
Ef1a	130	C.H	14	Spleen	19.9
Ef1a	130	C.H	14	Spleen	19.55	19.725		0.0371502
Ef1a	131	C.H	14	Spleen	20.11
Ef1a	131	C.H	14	Spleen	20.03	20.07		0.30785
Ef1a	132	C.H	14	Spleen	20.54
Ef1a	132	C.H	14	Spleen	20.55	20.545		0.78285
Ef1a	133	C.H	14	Spleen	19.97
Ef1a	133	C.H	14	Spleen	20.06	20.015		0.25285
Ef1a	134	E.S	14	Spleen	19.67
Ef1a	134	E.S	14	Spleen	19.83	19.75		0.0121502
Ef1a	135	E.S	14	Spleen	21.15
Ef1a	135	E.S	14	Spleen	21.28	21.215		1.45285
Ef1a	136	E.S	14	Spleen	20.65
Ef1a	136	E.S	14	Spleen	20.29	20.47		0.70785
Ef1a	137	E.S	14	Spleen	20.43
Ef1a	137	E.S	14	Spleen	20.81	20.62		0.85785
Ef1a	138	E.S	14	Spleen	19.85
Ef1a	138	E.S	14	Spleen	20.06	19.955		0.19285
Ef1a	139	E.H	14	Spleen	20.53
Ef1a	139	E.H	14	Spleen	19.86	20.195		0.43285
Ef1a	140	E.H	14	Spleen	20.07
Ef1a	140	E.H	14	Spleen	20.13	20.1		0.33785
Ef1a	141	E.H	14	Spleen	20.01
Ef1a	141	E.H	14	Spleen	20.03	20.02		0.25785
Ef1a	142	E.H	14	Spleen	20.21
Ef1a	142	E.H	14	Spleen	20.45	20.33		0.56785
Ef1a	143	E.H	14	Spleen	21.52
Ef1a	143	E.H	14	Spleen	21.79	21.655		1.89285
Ef1a	145	E.H	15	Spleen	19.77
Ef1a	145	E.H	15	Spleen	19.82	19.795		0.0328498
Ef1a	146	E.H	15	Spleen	18.96
Ef1a	146	E.H	15	Spleen	19.03	18.995		0.76715
Ef1a	147	E.H	15	Spleen	18.98
Ef1a	147	E.H	15	Spleen	18.97	18.975		0.78715
Ef1a	148	E.H	15	Spleen	18.67
Ef1a	148	E.H	15	Spleen	18.48	18.575		1.18715
Ef1a	153	E.H	15	Spleen	19.23
Ef1a	153	E.H	15	Spleen	19.2	19.215		0.54715
Ef1a	154	E.S	15	Spleen	19.13
Ef1a	154	E.S	15	Spleen	18.85	18.99		0.77215
Ef1a	155	E.S	15	Spleen	19.46
Ef1a	155	E.S	15	Spleen	19.31	19.385		0.37715
Ef1a	156	E.S	15	Spleen	19.14
Ef1a	156	E.S	15	Spleen	19.32	19.23		0.53215
Ef1a	157	E.S	15	Spleen	19.69
Ef1a	157	E.S	15	Spleen	19.66	19.675		0.0871502
Ef1a	158	E.S	15	Spleen	19.17
Ef1a	158	E.S	15	Spleen	19.28	19.225		0.53715
Ef1a	161	C.S	15	Spleen	19.03
Ef1a	161	C.S	15	Spleen	18.98	19.005		0.75715
Ef1a	162	C.S	15	Spleen	19.05
Ef1a	162	C.S	15	Spleen	18.99	19.02		0.74215
Ef1a	163	C.S	15	Spleen	19.42
Ef1a	163	C.S	15	Spleen	19.51	19.465		0.29715
Ef1a	164	C.S	15	Spleen	19.47
Ef1a	164	C.S	15	Spleen	19.73	19.6		0.16215
Ef1a	165	C.S	15	Spleen	19.8
Ef1a	165	C.S	15	Spleen	19.64	19.72		0.0421502
Ef1a	166	C.H	15	Spleen	19.28
Ef1a	166	C.H	15	Spleen	19.44	19.36		0.40215
Ef1a	167	C.H	15	Spleen	19.33
Ef1a	167	C.H	15	Spleen	19.2	19.265		0.49715
Ef1a	168	C.H	15	Spleen	20.5
Ef1a	168	C.H	15	Spleen	20.59	20.545		0.78285
Ef1a	169	C.H	15	Spleen	21.53
Ef1a	169	C.H	15	Spleen	21.47	21.5		1.73785
Ef1a	170	C.H	15	Spleen	19.14
Ef1a	170	C.H	15	Spleen	19.05	19.095		0.66715
Ef1a	179	C.S	21	Spleen	19.61
		C.S	21			19.61		0.15215
Ef1a	180	C.S	21	Spleen	19.4
		C.S	21			19.4		0.36215
Ef1a	181	C.S	21	Spleen	19.81
		C.S	21			19.81		0.0478498
Ef1a	182	C.S	21	Spleen	19.21
		C.S	21			19.21		0.55215
Ef1a	183	C.S	21	Spleen	20.24
		C.S	21			20.24		0.47785
Ef1a	184	C.H	21	Spleen	19.84
		C.H	21			19.84		0.0778498
Ef1a	185	C.H	21	Spleen	19.43
		C.H	21			19.43		0.33215
Ef1a	186	C.H	21	Spleen	19.52
		C.H	21			19.52		0.24215
Ef1a	187	C.H	21	Spleen	19.45
		C.H	21			19.45		0.31215
Ef1a	188	C.H	21	Spleen	19.57
		C.H	21			19.57		0.19215
Ef1a	189	E.S	21	Spleen	19.15
		E.S	21			19.15		0.61215
Ef1a	190	E.S	21	Spleen	18.8
		E.S	21			18.8		0.96215
Ef1a	191	E.S	21	Spleen	19.58
		E.S	21			19.58		0.18215
Ef1a	192	E.S	21	Spleen	19.9
Ef1a	192	E.S	21	Spleen	19.87	19.885		0.12285
Ef1a	193	E.S	21	Spleen	19.95
Ef1a	193	E.S	21	Spleen	20.07	20.01		0.24785
Ef1a	194	C.S	28	Spleen	18.48
Ef1a	194	C.S	28	Spleen	18.72	18.6		1.16215
Ef1a	195	C.S	28	Spleen	19.18
Ef1a	195	C.S	28	Spleen	19.31	19.245		0.51715
Ef1a	196	C.S	28	Spleen	19.13
Ef1a	196	C.S	28	Spleen	19.31	19.22		0.54215
Ef1a	197	C.S	28	Spleen	18.94
Ef1a	197	C.S	28	Spleen	19.1	19.02		0.74215
Ef1a	198	C.S	28	Spleen	19.38
Ef1a	198	C.S	28	Spleen	19.48	19.43		0.33215
Ef1a	199	C.H	28	Spleen	20.1
Ef1a	199	C.H	28	Spleen	19.66	19.88		0.11785
Ef1a	200	C.H	28	Spleen	19.51
Ef1a	200	C.H	28	Spleen	19.44	19.475		0.28715
Ef1a	201	C.H	28	Spleen	19.25
Ef1a	201	C.H	28	Spleen	19.27	19.26		0.50215
Ef1a	202	C.H	28	Spleen	21.74
Ef1a	202	C.H	28	Spleen	21.69	21.715		1.95285
Ef1a	203	C.H	28	Spleen	19.11
Ef1a	203	C.H	28	Spleen	19.22	19.165		0.59715
Ef1a	204	E.S	28	Spleen	19.39
Ef1a	204	E.S	28	Spleen	19.5	19.445		0.31715
Ef1a	205	E.S	28	Spleen	18.84
Ef1a	205	E.S	28	Spleen	18.92	18.88		0.88215
Ef1a	206	E.S	28	Spleen	19.38
Ef1a	206	E.S	28	Spleen	19.28	19.33		0.43215
Ef1a	207	E.S	28	Spleen	19.22
Ef1a	207	E.S	28	Spleen	19.61	19.415		0.34715
Ef1a	208	E.S	28	Spleen	19.65
Ef1a	208	E.S	28	Spleen	20.12	19.885		0.12285

## Sheet: CD8a - ddCt
Target	Sample	Group	DPE	Biological Set Name	Cq (CD8aa)	Cq Mean (CD8aa)	Cq Mean (EF1a)		dCt		ddCt		2^-ddCt
CD8a	43	C.S	1	Spleen	27.31
CD8a	43	C.S	1	Spleen	27.23	27.27	20.8		6.47		-0.723		1.65061
CD8a	44	C.S	1	Spleen	27.81
CD8a	44	C.S	1	Spleen	28.05	27.93	20.325		7.605		0.412		0.751581
CD8a	45	C.S	1	Spleen	26.85
CD8a	45	C.S	1	Spleen	27.17	27.01	19.905		7.105		-0.088		1.0629
CD8a	46	C.S	1	Spleen	25.96
CD8a	46	C.S	1	Spleen	26.21	26.085	19.695		6.39		-0.803		1.74473
CD8a	47	C.S	1	Spleen	28.45
CD8a	47	C.S	1	Spleen	28.37	28.41	20.015		8.395	7.193	1.202		0.434672	1.1289
CD8a	48	C.H	1	Spleen	30.2
CD8a	48	C.H	1	Spleen	29.96	30.08	22.755		7.325		0.132		0.912565
CD8a	49	C.H	1	Spleen	27.04
CD8a	49	C.H	1	Spleen	27.04	27.04	20.115		6.925		-0.268		1.20414
CD8a	50	C.H	1	Spleen	27.53
CD8a	50	C.H	1	Spleen	27.38	27.455	20.39		7.065		-0.128		1.09278
CD8a	51	C.H	1	Spleen	26.78
CD8a	51	C.H	1	Spleen	27.16	26.97	19.85		7.12		-0.073		1.0519
CD8a	52	C.H	1	Spleen	27.23
CD8a	52	C.H	1	Spleen	27.01	27.12	20.055		7.065		-0.128		1.09278
CD8a	53	E.S	1	Spleen	28.52
CD8a	53	E.S	1	Spleen	28.61	28.565	19.615		8.95		1.757		0.295863
CD8a	54	E.S	1	Spleen	26.04
CD8a	54	E.S	1	Spleen	26.03	26.035	19.785		6.25		-0.943		1.92252
CD8a	55	E.S	1	Spleen	26.39
CD8a	55	E.S	1	Spleen	26.3	26.345	20.19		6.155		-1.038		2.05338
CD8a	56	E.S	1	Spleen	27.03
CD8a	56	E.S	1	Spleen	27.09	27.06	19.695		7.365		0.172		0.887611
CD8a	57	E.S	1	Spleen	26.59
CD8a	57	E.S	1	Spleen	26.31	26.45	20.115		6.335		-0.858		1.81252
CD8a	58	E.H	1	Spleen	27.04
CD8a	58	E.H	1	Spleen	26.22	26.63	19.885		6.745		-0.448		1.36415
CD8a	59	E.H	1	Spleen	26.87
CD8a	59	E.H	1	Spleen	27.28	27.075	20.145		6.93		-0.263		1.19997
CD8a	60	E.H	1	Spleen	28.22
CD8a	60	E.H	1	Spleen	27.77	27.995	19.71		8.285		1.092		0.469111
CD8a	61	E.H	1	Spleen	25.86
CD8a	61	E.H	1	Spleen	26	25.93	19.895		6.035		-1.158		2.23148
CD8a	62	E.H	1	Spleen	26.51
CD8a	62	E.H	1	Spleen	26.52	26.515	19.535		6.98		-0.213		1.1591
CD8a	63	C.S	3	Spleen	27.02
CD8a	63	C.S	3	Spleen	27.16	27.09	19.41		7.68		0.487		0.713507
CD8a	64	C.S	3	Spleen	27.28
CD8a	64	C.S	3	Spleen	27.07	27.175	19.175		8		0.807		0.571569
CD8a	65	C.S	3	Spleen	27.18
CD8a	65	C.S	3	Spleen	27.41	27.295	19.575		7.72		0.527		0.693996
CD8a	66	C.S	3	Spleen	28.07
CD8a	66	C.S	3	Spleen	27.94	28.005	20.785		7.22		0.027		0.981459
CD8a	67	C.S	3	Spleen	27.38
CD8a	67	C.S	3	Spleen	27.44	27.41	19.665		7.745		0.552		0.682074
CD8a	68	C.H	3	Spleen	26.96
CD8a	68	C.H	3	Spleen	26.84	26.9	19.875		7.025		-0.168		1.1235
CD8a	69	C.H	3	Spleen	26.61
CD8a	69	C.H	3	Spleen	26.59	26.6	19.465		7.135		-0.058		1.04102
CD8a	70	C.H	3	Spleen	28.78
CD8a	70	C.H	3	Spleen	28.49	28.635	21.985		6.65		-0.543		1.457
CD8a	71	C.H	3	Spleen	27.91
CD8a	71	C.H	3	Spleen	27.95	27.93	19.765		8.165		0.972		0.509799
CD8a	72	C.H	3	Spleen	26.86
CD8a	72	C.H	3	Spleen	27.1	26.98	19.47		7.51		0.317		0.802737
CD8a	73	E.S	3	Spleen	27.25
CD8a	73	E.S	3	Spleen	27.52	27.385	19.5		7.885		0.692		0.618995
CD8a	74	E.S	3	Spleen	27.43
CD8a	74	E.S	3	Spleen	27.16	27.295	19.345		7.95		0.757		0.591726
CD8a	75	E.S	3	Spleen	27.46
CD8a	75	E.S	3	Spleen	27.09	27.275	19.63		7.645		0.452		0.731029
CD8a	76	E.S	3	Spleen	30.09
CD8a	76	E.S	3	Spleen	29.99	30.04	22.23		7.81		0.617		0.652025
CD8a	77	E.S	3	Spleen	27.6
CD8a	77	E.S	3	Spleen	27.68	27.64	19.8		7.84		0.647		0.638607
CD8a	78	E.H	3	Spleen	28.75
CD8a	78	E.H	3	Spleen	28.65	28.7	20.14		8.56		1.367		0.387697
CD8a	79	E.H	3	Spleen	27.74
CD8a	79	E.H	3	Spleen	28.09	27.915	20.73		7.185		-0.008		1.00556
CD8a	80	E.H	3	Spleen	27.25
CD8a	80	E.H	3	Spleen	27.28	27.265	19.26		8.005		0.812		0.569592
CD8a	81	E.H	3	Spleen	26.94
CD8a	81	E.H	3	Spleen	27.38	27.16	19.435		7.725		0.532		0.691595
CD8a	82	E.H	3	Spleen	26.93
CD8a	82	E.H	3	Spleen	27.03	26.98	19.595		7.385		0.192		0.875391
CD8a	83	C.S	7	Spleen	28.75
CD8a	83	C.S	7	Spleen	28.72	28.735	19.96		8.775		1.582		0.334019
CD8a	84	C.S	7	Spleen	27.36
CD8a	84	C.S	7	Spleen	27.23	27.295	19.33		7.965		0.772		0.585605
CD8a	85	C.S	7	Spleen	26.86
CD8a	85	C.S	7	Spleen	26.89	26.875	19.39		7.485		0.292		0.816769
CD8a	86	C.S	7	Spleen	27.43
CD8a	86	C.S	7	Spleen	27.45	27.44	19.065		8.375		1.182		0.44074
CD8a	87	C.S	7	Spleen	26.78
CD8a	87	C.S	7	Spleen	26.7	26.74	19.14		7.6		0.407		0.75419
CD8a	88	C.H	7	Spleen	26.49
CD8a	88	C.H	7	Spleen	26.46	26.475	19.31		7.165		-0.028		1.0196
CD8a	89	C.H	7	Spleen	26.22
CD8a	89	C.H	7	Spleen	26.32	26.27	19.4		6.87		-0.323		1.25093
CD8a	90	C.H	7	Spleen	27.24
CD8a	90	C.H	7	Spleen	27.6	27.42	19.86		7.56		0.367		0.775393
CD8a	91	C.H	7	Spleen	32
CD8a	91	C.H	7	Spleen	32.14	32.07	23.515		8.555		1.362		0.389043
CD8a	92	C.H	7	Spleen	27.68
CD8a	92	C.H	7	Spleen	27.52	27.6	19.82		7.78		0.587		0.665726
CD8a	93	E.S	7	Spleen	27.7
CD8a	93	E.S	7	Spleen	27.73	27.715	19.075		8.64		1.447		0.366783
CD8a	94	E.S	7	Spleen	28.63
CD8a	94	E.S	7	Spleen	28.62	28.625	20.42		8.205		1.012		0.495858
CD8a	95	E.S	7	Spleen	27.08
CD8a	95	E.S	7	Spleen	26.89	26.985	18.85		8.135		0.942		0.520511
CD8a	96	E.S	7	Spleen	28.56
CD8a	96	E.S	7	Spleen	28.67	28.615	20.115		8.5		1.307		0.40416
CD8a	97	E.S	7	Spleen	28.93
CD8a	97	E.S	7	Spleen	29.02	28.975	20.87		8.105		0.912		0.531448
CD8a	98	E.H	7	Spleen	27.49
CD8a	98	E.H	7	Spleen	27.96	27.725	19.59		8.135		0.942		0.520511
CD8a	99	E.H	7	Spleen	28.67
CD8a	99	E.H	7	Spleen	28.16	28.415	19.44		8.975		1.782		0.29078
CD8a	100	E.H	7	Spleen	28.58
CD8a	100	E.H	7	Spleen	28.22	28.4	20.57		7.83		0.637		0.643049
CD8a	101	E.H	7	Spleen	26.58
CD8a	101	E.H	7	Spleen	26.63	26.605	18.895		7.71		0.517		0.698823
CD8a	102	E.H	7	Spleen	28.31
CD8a	102	E.H	7	Spleen	28.51	28.41	19.08		9.33		2.137		0.227352
CD8a	104	C.S	10	Spleen	27.23
CD8a	104	C.S	10	Spleen	27.15	27.19	18.76		8.43		1.237		0.424254
CD8a	105	C.S	10	Spleen	33.02
CD8a	105	C.S	10	Spleen	28.08	28.08	19.41		8.67		1.477		0.359235
CD8a	106	C.S	10	Spleen	27.33
CD8a	106	C.S	10	Spleen	27.15	27.24	19.265		7.975		0.782		0.58156
CD8a	107	C.S	10	Spleen	27.6
CD8a	107	C.S	10	Spleen	27.93	27.765	19.57		8.195		1.002		0.499307
CD8a	108	C.S	10	Spleen	27.5
CD8a	108	C.S	10	Spleen	28.06	27.78	19.915		7.865		0.672		0.627636
CD8a	109	C.H	10	Spleen	27.48
CD8a	109	C.H	10	Spleen	27.23	27.355	19.675		7.68		0.487		0.713507
CD8a	110	C.H	10	Spleen	27.71
CD8a	110	C.H	10	Spleen	27.81	27.76	20.54		7.22		0.027		0.981459
CD8a	111	C.H	10	Spleen	27.33
CD8a	111	C.H	10	Spleen	27.32	27.325	19.32		8.005		0.812		0.569592
CD8a	112	C.H	10	Spleen	28.78
CD8a	112	C.H	10	Spleen	28.62	28.7	19.105		9.595		2.402		0.189202
CD8a	113	C.H	10	Spleen	28.1
CD8a	113	C.H	10	Spleen	27.05	27.575	19.155		8.42		1.227		0.427205
CD8a	114	E.S	10	Spleen	28.35
CD8a	114	E.S	10	Spleen	27.76	28.055	19.515		8.54		1.347		0.393109
CD8a	115	E.S	10	Spleen	28.83
CD8a	115	E.S	10	Spleen	28.83	28.83	19.65		9.18		1.987		0.252263
CD8a	116	E.S	10	Spleen	27.5
CD8a	116	E.S	10	Spleen	27.53	27.515	19.57		7.945		0.752		0.59378
CD8a	117	E.S	10	Spleen	26.89
CD8a	117	E.S	10	Spleen	27.03	26.96	19.265		7.695		0.502		0.706127
CD8a	118	E.S	10	Spleen	27.08
CD8a	118	E.S	10	Spleen	27.03	27.055	19.355		7.7		0.507		0.703684
CD8a	119	E.H	10	Spleen	26.82
CD8a	119	E.H	10	Spleen	26.96	26.89	18.815		8.075		0.882		0.542615
CD8a	120	E.H	10	Spleen	27.79
CD8a	120	E.H	10	Spleen	27.89	27.84	19.285		8.555		1.362		0.389043
CD8a	121	E.H	10	Spleen	28.49
CD8a	121	E.H	10	Spleen	28.1	28.295	19.125		9.17		1.977		0.254018
CD8a	122	E.H	10	Spleen	27.01
CD8a	122	E.H	10	Spleen	27.2	27.105	19.255		7.85		0.657		0.634196
CD8a	123	E.H	10	Spleen	27.47
CD8a	123	E.H	10	Spleen	27.97	27.72	19.645		8.075		0.882		0.542615
CD8a	124	C.S	14	Spleen	28.21
CD8a	124	C.S	14	Spleen	28.07	28.14	20.63		7.51		0.317		0.802737
CD8a	125	C.S	14	Spleen	28.69
CD8a	125	C.S	14	Spleen	28.67	28.68	20.015		8.665		1.472		0.360482
CD8a	126	C.S	14	Spleen	28.02
CD8a	126	C.S	14	Spleen	28.17	28.095	19.8		8.295		1.102		0.46587
CD8a	127	C.S	14	Spleen	29.29
CD8a	127	C.S	14	Spleen	29.23	29.26	20.6		8.66		1.467		0.361734
CD8a	128	C.S	14	Spleen	28.09
CD8a	128	C.S	14	Spleen	28.37	28.23	19.51		8.72		1.527		0.346998
CD8a	129	C.H	14	Spleen	28.71
CD8a	129	C.H	14	Spleen	28.74	28.725	20.135		8.59		1.397		0.379718
CD8a	130	C.H	14	Spleen	28.02
CD8a	130	C.H	14	Spleen	28.29	28.155	19.725		8.43		1.237		0.424254
CD8a	131	C.H	14	Spleen	28.86
CD8a	131	C.H	14	Spleen	29.37	29.115	20.07		9.045		1.852		0.277008
CD8a	132	C.H	14	Spleen	29.25
CD8a	132	C.H	14	Spleen	28.82	29.035	20.545		8.49		1.297		0.406972
CD8a	133	C.H	14	Spleen	28.36
CD8a	133	C.H	14	Spleen	28.54	28.45	20.015		8.435		1.242		0.422786
CD8a	134	E.S	14	Spleen	28.04
CD8a	134	E.S	14	Spleen	28	28.02	19.75		8.27		1.077		0.474013
CD8a	135	E.S	14	Spleen	28.66
CD8a	135	E.S	14	Spleen	28.57	28.615	21.215		7.4		0.207		0.866337
CD8a	136	E.S	14	Spleen	27.98
CD8a	136	E.S	14	Spleen	27.81	27.895	20.47		7.425		0.232		0.851454
CD8a	137	E.S	14	Spleen	27.5
CD8a	137	E.S	14	Spleen	27.72	27.61	20.62		6.99		-0.203		1.15109
CD8a	138	E.S	14	Spleen	27.76
CD8a	138	E.S	14	Spleen	28.04	27.9	19.955		7.945		0.752		0.59378
CD8a	139	E.H	14	Spleen	28.68
CD8a	139	E.H	14	Spleen	29.38	29.03	20.195		8.835		1.642		0.320412
CD8a	140	E.H	14	Spleen	28.3
CD8a	140	E.H	14	Spleen	28.52	28.41	20.1		8.31		1.117		0.461052
CD8a	141	E.H	14	Spleen	28.25
CD8a	141	E.H	14	Spleen	28.12	28.185	20.02		8.165		0.972		0.509799
CD8a	142	E.H	14	Spleen	29.62
CD8a	142	E.H	14	Spleen	29.65	29.635	20.33		9.305		2.112		0.231326
CD8a	143	E.H	14	Spleen	30.05
CD8a	143	E.H	14	Spleen	29.89	29.97	21.655		8.315		1.122		0.459456
CD8a	145	E.H	15	Spleen	27.08
CD8a	145	E.H	15	Spleen	27.03	27.055	19.795		7.26		0.067		0.954621
CD8a	146	E.H	15	Spleen	26.6
CD8a	146	E.H	15	Spleen	26.63	26.615	18.995		7.62		0.427		0.743807
CD8a	147	E.H	15	Spleen	26.5
CD8a	147	E.H	15	Spleen	26.62	26.56	18.975		7.585		0.392		0.762072
CD8a	148	E.H	15	Spleen	25.43
CD8a	148	E.H	15	Spleen	25.52	25.475	18.575		6.9		-0.293		1.22519
CD8a	153	E.H	15	Spleen	27.59
CD8a	153	E.H	15	Spleen	27.49	27.54	19.215		8.325		1.132		0.456283
CD8a	154	E.S	15	Spleen	25.56
CD8a	154	E.S	15	Spleen	25.47	25.515	18.99		6.525		-0.668		1.58887
CD8a	155	E.S	15	Spleen	26.77
CD8a	155	E.S	15	Spleen	26.85	26.81	19.385		7.425		0.232		0.851454
CD8a	156	E.S	15	Spleen	27.2
CD8a	156	E.S	15	Spleen	27.5	27.35	19.23		8.12		0.927		0.525951
CD8a	157	E.S	15	Spleen	27.07
CD8a	157	E.S	15	Spleen	26.77	26.92	19.675		7.245		0.052		0.964598
CD8a	158	E.S	15	Spleen	26.56
CD8a	158	E.S	15	Spleen	26.48	26.52	19.225		7.295		0.102		0.93174
CD8a	161	C.S	15	Spleen	29.51
CD8a	161	C.S	15	Spleen	29.12	29.315	19.005		10.31		3.117		0.115263
CD8a	162	C.S	15	Spleen	27.36
CD8a	162	C.S	15	Spleen	27.24	27.3	19.02		8.28		1.087		0.470739
CD8a	163	C.S	15	Spleen	27.98
CD8a	163	C.S	15	Spleen	28.05	28.015	19.465		8.55		1.357		0.390393
CD8a	164	C.S	15	Spleen	28.8
CD8a	164	C.S	15	Spleen	28.66	28.73	19.6		9.13		1.937		0.261159
CD8a	165	C.S	15	Spleen	27.15
CD8a	165	C.S	15	Spleen	26.96	27.055	19.72		7.335		0.142		0.906262
CD8a	166	C.H	15	Spleen	27.21
CD8a	166	C.H	15	Spleen	27.05	27.13	19.36		7.77		0.577		0.670356
CD8a	167	C.H	15	Spleen	28.44
CD8a	167	C.H	15	Spleen	28.87	28.655	19.265		9.39		2.197		0.218091
CD8a	168	C.H	15	Spleen	28.05
CD8a	168	C.H	15	Spleen	27.85	27.95	20.545		7.405		0.212		0.86334
CD8a	169	C.H	15	Spleen	28.5
CD8a	169	C.H	15	Spleen	28.23	28.365	21.5		6.865		-0.328		1.25527
CD8a	170	C.H	15	Spleen	27.7
CD8a	170	C.H	15	Spleen	27.64	27.67	19.095		8.575		1.382		0.383687
CD8a	179	C.S	21	Spleen	28.08
CD8a	179	C.S	21	Spleen	28.24	28.16	19.61		8.55		1.357		0.390393
CD8a	180	C.S	21	Spleen	28.36
CD8a	180	C.S	21	Spleen	28.19	28.275	19.4		8.875		1.682		0.31165
CD8a	181	C.S	21	Spleen	27.79
CD8a	181	C.S	21	Spleen	27.36	27.575	19.81		7.765		0.572		0.672684
CD8a	182	C.S	21	Spleen	28.26
CD8a	182	C.S	21	Spleen	27.9	28.08	19.21		8.87		1.677		0.312732
CD8a	183	C.S	21	Spleen	28.1
CD8a	183	C.S	21	Spleen	28.02	28.06	20.24		7.82		0.627		0.647521
CD8a	184	C.H	21	Spleen	27.67
CD8a	184	C.H	21	Spleen	27.86	27.765	19.84		7.925		0.732		0.602069
CD8a	185	C.H	21	Spleen	27.59
CD8a	185	C.H	21	Spleen	27.6	27.595	19.43		8.165		0.972		0.509799
CD8a	186	C.H	21	Spleen	27.51
CD8a	186	C.H	21	Spleen	27.44	27.475	19.52		7.955		0.762		0.589678
CD8a	187	C.H	21	Spleen	28.28
CD8a	187	C.H	21	Spleen	28.53	28.405	19.45		8.955		1.762		0.294839
CD8a	188	C.H	21	Spleen	28.02
CD8a	188	C.H	21	Spleen	27.76	27.89	19.57		8.32		1.127		0.457867
CD8a	189	E.S	21	Spleen	27.08
CD8a	189	E.S	21	Spleen	26.76	26.92	19.15		7.77		0.577		0.670356
CD8a	190	E.S	21	Spleen	26.88
CD8a	190	E.S	21	Spleen	26.92	26.9	18.8		8.1		0.907		0.533293
CD8a	191	E.S	21	Spleen	27.32
CD8a	191	E.S	21	Spleen	27.06	27.19	19.58		7.61		0.417		0.74898
CD8a	192	E.S	21	Spleen	27.8
CD8a	192	E.S	21	Spleen	27.96	27.88	19.885		7.995		0.802		0.573554
CD8a	193	E.S	21	Spleen	27.62
CD8a	193	E.S	21	Spleen	27.47	27.545	20.01		7.535		0.342		0.788947
CD8a	194	C.S	28	Spleen	26.59
CD8a	194	C.S	28	Spleen	26.73	26.66	18.6		8.06		0.867		0.548286
CD8a	195	C.S	28	Spleen	26.93
CD8a	195	C.S	28	Spleen	27.17	27.05	19.245		7.805		0.612		0.654289
CD8a	196	C.S	28	Spleen	26.55
CD8a	196	C.S	28	Spleen	26.36	26.455	19.22		7.235		0.042		0.971307
CD8a	197	C.S	28	Spleen	26.73
CD8a	197	C.S	28	Spleen	27.14	26.935	19.02		7.915		0.722		0.606256
CD8a	198	C.S	28	Spleen	28.48
CD8a	198	C.S	28	Spleen	28.51	28.495	19.43		9.065		1.872		0.273194
CD8a	199	C.H	28	Spleen	26.84
CD8a	199	C.H	28	Spleen	26.74	26.79	19.88		6.91		-0.283		1.21672
CD8a	200	C.H	28	Spleen	26.89
CD8a	200	C.H	28	Spleen	26.8	26.845	19.475		7.37		0.177		0.88454
CD8a	201	C.H	28	Spleen	28.32
CD8a	201	C.H	28	Spleen	28.51	28.415	19.26		9.155		1.962		0.256672
CD8a	202	C.H	28	Spleen	28.46
CD8a	202	C.H	28	Spleen	28.34	28.4	21.715		6.685		-0.508		1.42208
CD8a	203	C.H	28	Spleen	24.65
CD8a	203	C.H	28	Spleen	24.52	24.585	19.165		5.42		-1.773		3.41764
CD8a	204	E.S	28	Spleen	28.03
CD8a	204	E.S	28	Spleen	27.79	27.91	19.445		8.465		1.272		0.414085
CD8a	205	E.S	28	Spleen	28.71
CD8a	205	E.S	28	Spleen	28.86	28.785	18.88		9.905		2.712		0.152618
CD8a	206	E.S	28	Spleen	27.24
CD8a	206	E.S	28	Spleen	27.36	27.3	19.33		7.97		0.777		0.583579
CD8a	207	E.S	28	Spleen	27.81
CD8a	207	E.S	28	Spleen	28.3	28.055	19.415		8.64		1.447		0.366783
CD8a	208	E.S	28	Spleen	27.02
CD8a	208	E.S	28	Spleen	26.59	26.805	19.885		6.92		-0.273		1.20832

## Sheet: CD4 - ddCt
Target	Sample	Group	DPE	Biological Set Name	Cq (CD4)	Cq Mean (CD4)	Cq Mean (EF1a)		dCt		ddCt		2^-ddCt
CD4	43	C.S	1	Spleen	22.32							C.S
CD4	43	C.S	1	Spleen	22.79	22.555	20.8		1.755		-0.768	C.S	1.70291
CD4	44	C.S	1	Spleen	22.63							C.S
CD4	44	C.S	1	Spleen	23.17	22.9	20.325		2.575		0.052	C.S	0.964598
CD4	45	C.S	1	Spleen	22.07							C.S
CD4	45	C.S	1	Spleen	21.79	21.93	19.905		2.025		-0.498	C.S	1.41225
CD4	46	C.S	1	Spleen	22.57							C.S
CD4	46	C.S	1	Spleen	23.01	22.79	19.695		3.095		0.572	C.S	0.672684
CD4	47	C.S	1	Spleen	22.93							C.S
CD4	47	C.S	1	Spleen	23.43	23.18	20.015		3.165	2.523	0.642	C.S	0.640824	1.07865
CD4	48	C.H	1	Spleen	26.09							C.H
CD4	48	C.H	1	Spleen	26.2	26.145	22.755		3.39		0.867	C.H	0.548286
CD4	49	C.H	1	Spleen	22.96							C.H
CD4	49	C.H	1	Spleen	23.02	22.99	20.115		2.875		0.352	C.H	0.783497
CD4	50	C.H	1	Spleen	22.51							C.H
CD4	50	C.H	1	Spleen	22.39	22.45	20.39		2.06		-0.463	C.H	1.37841
CD4	51	C.H	1	Spleen	23.46							C.H
CD4	51	C.H	1	Spleen	23.28	23.37	19.85		3.52		0.997	C.H	0.501041
CD4	52	C.H	1	Spleen	23.17							C.H
CD4	52	C.H	1	Spleen	23.07	23.12	20.055		3.065		0.542	C.H	0.686818
CD4	53	E.S	1	Spleen	21.58							E.S
CD4	53	E.S	1	Spleen	21.72	21.65	19.615		2.035		-0.488	E.S	1.4025
CD4	54	E.S	1	Spleen	21.88							E.S
CD4	54	E.S	1	Spleen	22.01	21.945	19.785		2.16		-0.363	E.S	1.2861
CD4	55	E.S	1	Spleen	21.31							E.S
CD4	55	E.S	1	Spleen	21.63	21.47	20.19		1.28		-1.243	E.S	2.3669
CD4	56	E.S	1	Spleen	21.97							E.S
CD4	56	E.S	1	Spleen	22.09	22.03	19.695		2.335		-0.188	E.S	1.13918
CD4	57	E.S	1	Spleen	21.6							E.S
CD4	57	E.S	1	Spleen	22.02	21.81	20.115		1.695		-0.828	E.S	1.77522
CD4	58	E.H	1	Spleen	22.59							E.H
CD4	58	E.H	1	Spleen	37.8	30.195	19.885		10.31		7.787	E.H	0.00452772
CD4	59	E.H	1	Spleen	23.18							E.H
CD4	59	E.H	1	Spleen	22.92	23.05	20.145		2.905		0.382	E.H	0.767373
CD4	60	E.H	1	Spleen	23.53							E.H
CD4	60	E.H	1	Spleen	23.29	23.41	19.71		3.7		1.177	E.H	0.44227
CD4	61	E.H	1	Spleen	22.17							E.H
CD4	61	E.H	1	Spleen	36.88	29.525	19.895		9.63		7.107	E.H	0.00725404
CD4	62	E.H	1	Spleen	21.99							E.H
CD4	62	E.H	1	Spleen	22.28	22.135	19.535		2.6		0.077	E.H	0.948027
CD4	63	C.S	3	Spleen	21.65							C.S
CD4	63	C.S	3	Spleen	21.98	21.815	19.41		2.405		-0.118	C.S	1.08523
CD4	64	C.S	3	Spleen	21.93							C.S
CD4	64	C.S	3	Spleen	22.3	22.115	19.175		2.94		0.417	C.S	0.74898
CD4	65	C.S	3	Spleen	22.04							C.S
CD4	65	C.S	3	Spleen	22.34	22.19	19.575		2.615		0.092	C.S	0.938221
CD4	66	C.S	3	Spleen	23.31							C.S
CD4	66	C.S	3	Spleen	23.23	23.27	20.785		2.485		-0.038	C.S	1.02669
CD4	67	C.S	3	Spleen	22.72							C.S
CD4	67	C.S	3	Spleen	22.46	22.59	19.665		2.925		0.402	C.S	0.756808
CD4	68	C.H	3	Spleen	22.32							C.H
CD4	68	C.H	3	Spleen	22.18	22.25	19.875		2.375		-0.148	C.H	1.10803
CD4	69	C.H	3	Spleen	22.24							C.H
CD4	69	C.H	3	Spleen	22.29	22.265	19.465		2.8		0.277	C.H	0.825305
CD4	70	C.H	3	Spleen	23.6							C.H
CD4	70	C.H	3	Spleen	23.56	23.58	21.985		1.595		-0.928	C.H	1.90264
CD4	71	C.H	3	Spleen	22.84							C.H
CD4	71	C.H	3	Spleen	22.72	22.78	19.765		3.015		0.492	C.H	0.711039
CD4	72	C.H	3	Spleen	22.79							C.H
CD4	72	C.H	3	Spleen	23.13	22.96	19.47		3.49		0.967	C.H	0.511569
CD4	73	E.S	3	Spleen	22.06							E.S
CD4	73	E.S	3	Spleen	22.12	22.09	19.5		2.59		0.067	E.S	0.954621
CD4	74	E.S	3	Spleen	22.5							E.S
CD4	74	E.S	3	Spleen	22.85	22.675	19.345		3.33		0.807	E.S	0.571569
CD4	75	E.S	3	Spleen	22.62							E.S
CD4	75	E.S	3	Spleen	22.23	22.425	19.63		2.795		0.272	E.S	0.828171
CD4	76	E.S	3	Spleen	24.45							E.S
CD4	76	E.S	3	Spleen	24.55	24.5	22.23		2.27		-0.253	E.S	1.19168
CD4	77	E.S	3	Spleen	22.22							E.S
CD4	77	E.S	3	Spleen	22.23	22.225	19.8		2.425		-0.098	E.S	1.07029
CD4	78	E.H	3	Spleen	23.06							E.H
CD4	78	E.H	3	Spleen	23.19	23.125	20.14		2.985		0.462	E.H	0.725979
CD4	79	E.H	3	Spleen	23.46							E.H
CD4	79	E.H	3	Spleen	23.46	23.46	20.73		2.73		0.207	E.H	0.866337
CD4	80	E.H	3	Spleen	22.05							E.H
CD4	80	E.H	3	Spleen	21.98	22.015	19.26		2.755		0.232	E.H	0.851454
CD4	81	E.H	3	Spleen	22.64							E.H
CD4	81	E.H	3	Spleen	23.3	22.97	19.435		3.535		1.012	E.H	0.495858
CD4	82	E.H	3	Spleen	22.67							E.H
CD4	82	E.H	3	Spleen	22.77	22.72	19.595		3.125		0.602	E.H	0.65884
CD4	83	C.S	7	Spleen	23.02							C.S
CD4	83	C.S	7	Spleen	23.09	23.055	19.96		3.095		0.572	C.S	0.672684
CD4	84	C.S	7	Spleen	22.45							C.S
CD4	84	C.S	7	Spleen	22.43	22.44	19.33		3.11		0.587	C.S	0.665726
CD4	85	C.S	7	Spleen	22.63							C.S
CD4	85	C.S	7	Spleen	22.96	22.795	19.39		3.405		0.882	C.S	0.542615
CD4	86	C.S	7	Spleen	21.97							C.S
CD4	86	C.S	7	Spleen	22.21	22.09	19.065		3.025		0.502	C.S	0.706127
CD4	87	C.S	7	Spleen	22.27							C.S
CD4	87	C.S	7	Spleen	22.35	22.31	19.14		3.17		0.647	C.S	0.638607
CD4	88	C.H	7	Spleen	22.63							C.H
CD4	88	C.H	7	Spleen	22.57	22.6	19.31		3.29		0.767	C.H	0.587638
CD4	89	C.H	7	Spleen	21.74							C.H
CD4	89	C.H	7	Spleen	22.09	21.915	19.4		2.515		-0.008	C.H	1.00556
CD4	90	C.H	7	Spleen	22.72							C.H
CD4	90	C.H	7	Spleen	23.63	23.175	19.86		3.315		0.792	C.H	0.577543
CD4	91	C.H	7	Spleen	25.63							C.H
CD4	91	C.H	7	Spleen	25.37	25.5	23.515		1.985		-0.538	C.H	1.45196
CD4	92	C.H	7	Spleen	22.42							C.H
CD4	92	C.H	7	Spleen	22.45	22.435	19.82		2.615		0.092	C.H	0.938221
CD4	93	E.S	7	Spleen	22.06							E.S
CD4	93	E.S	7	Spleen	22.03	22.045	19.075		2.97		0.447	E.S	0.733567
CD4	94	E.S	7	Spleen	22.99							E.S
CD4	94	E.S	7	Spleen	23.25	23.12	20.42		2.7		0.177	E.S	0.88454
CD4	95	E.S	7	Spleen	22.18							E.S
CD4	95	E.S	7	Spleen	22.2	22.19	18.85		3.34		0.817	E.S	0.567621
CD4	96	E.S	7	Spleen	23.44							E.S
CD4	96	E.S	7	Spleen	23.55	23.495	20.115		3.38		0.857	E.S	0.552099
CD4	97	E.S	7	Spleen	23.05							E.S
CD4	97	E.S	7	Spleen	23.22	23.135	20.87		2.265		-0.258	E.S	1.19582
CD4	98	E.H	7	Spleen	22.94							E.H
CD4	98	E.H	7	Spleen	23.06	23	19.59		3.41		0.887	E.H	0.540737
CD4	99	E.H	7	Spleen	23.06							E.H
CD4	99	E.H	7	Spleen	22.59	22.825	19.44		3.385		0.862	E.H	0.550189
CD4	100	E.H	7	Spleen	23.23							E.H
CD4	100	E.H	7	Spleen	23.08	23.155	20.57		2.585		0.062	E.H	0.957935
CD4	101	E.H	7	Spleen	21.72							E.H
CD4	101	E.H	7	Spleen	21.61	21.665	18.895		2.77		0.247	E.H	0.842647
CD4	102	E.H	7	Spleen	22.24							E.H
CD4	102	E.H	7	Spleen	22.26	22.25	19.08		3.17		0.647	E.H	0.638607
CD4	104	C.S	10	Spleen	22.23							C.S
CD4	104	C.S	10	Spleen	22.16	22.195	18.76		3.435		0.912	C.S	0.531448
CD4	105	C.S	10	Spleen	22.7							C.S
CD4	105	C.S	10	Spleen	22.55	22.625	19.41		3.215		0.692	C.S	0.618995
CD4	106	C.S	10	Spleen	22.53							C.S
CD4	106	C.S	10	Spleen	22.43	22.48	19.265		3.215		0.692	C.S	0.618995
CD4	107	C.S	10	Spleen	23.21							C.S
CD4	107	C.S	10	Spleen	23.02	23.115	19.57		3.545		1.022	C.S	0.492433
CD4	108	C.S	10	Spleen	23.76							C.S
CD4	108	C.S	10	Spleen	23.26	23.51	19.915		3.595		1.072	C.S	0.475659
CD4	109	C.H	10	Spleen	22.82							C.H
CD4	109	C.H	10	Spleen	22.45	22.635	19.675		2.96		0.437	C.H	0.738669
CD4	110	C.H	10	Spleen	22.67							C.H
CD4	110	C.H	10	Spleen	22.76	22.715	20.54		2.175		-0.348	C.H	1.27279
CD4	111	C.H	10	Spleen	22.2							C.H
CD4	111	C.H	10	Spleen	22.18	22.19	19.32		2.87		0.347	C.H	0.786217
CD4	112	C.H	10	Spleen	21.49							C.H
CD4	112	C.H	10	Spleen	21.58	21.535	19.105		2.43		-0.093	C.H	1.06659
CD4	113	C.H	10	Spleen	22.11							C.H
CD4	113	C.H	10	Spleen	22.16	22.135	19.155		2.98		0.457	C.H	0.7285
CD4	114	E.S	10	Spleen	22.4							E.S
CD4	114	E.S	10	Spleen	23.1	22.75	19.515		3.235		0.712	E.S	0.610473
CD4	115	E.S	10	Spleen	22.91							E.S
CD4	115	E.S	10	Spleen	22.67	22.79	19.65		3.14		0.617	E.S	0.652025
CD4	116	E.S	10	Spleen	22.44							E.S
CD4	116	E.S	10	Spleen	22.3	22.37	19.57		2.8		0.277	E.S	0.825305
CD4	117	E.S	10	Spleen	22.42							E.S
CD4	117	E.S	10	Spleen	22.43	22.425	19.265		3.16		0.637	E.S	0.643049
CD4	118	E.S	10	Spleen	21.72							E.S
CD4	118	E.S	10	Spleen	21.76	21.74	19.355		2.385		-0.138	E.S	1.10038
CD4	119	E.H	10	Spleen	21.76							E.H
CD4	119	E.H	10	Spleen	22.02	21.89	18.815		3.075		0.552	E.H	0.682074
CD4	120	E.H	10	Spleen	22.52							E.H
CD4	120	E.H	10	Spleen	22.58	22.55	19.285		3.265		0.742	E.H	0.59791
CD4	121	E.H	10	Spleen	21.07							E.H
CD4	121	E.H	10	Spleen	21.22	21.145	19.125		2.02		-0.503	E.H	1.41716
CD4	122	E.H	10	Spleen	21.66							E.H
CD4	122	E.H	10	Spleen	21.85	21.755	19.255		2.5		-0.023	E.H	1.01607
CD4	123	E.H	10	Spleen	22.66							E.H
CD4	123	E.H	10	Spleen	23.09	22.875	19.645		3.23		0.707	E.H	0.612593
CD4	124	C.S	14	Spleen	24.02							C.S
CD4	124	C.S	14	Spleen	24.1	24.06	20.63		3.43		0.907	C.S	0.533293
CD4	125	C.S	14	Spleen	22.93							C.S
CD4	125	C.S	14	Spleen	22.95	22.94	20.015		2.925		0.402	C.S	0.756808
CD4	126	C.S	14	Spleen	22.69							C.S
CD4	126	C.S	14	Spleen	22.72	22.705	19.8		2.905		0.382	C.S	0.767373
CD4	127	C.S	14	Spleen	23.15							C.S
CD4	127	C.S	14	Spleen	23.24	23.195	20.6		2.595		0.072	C.S	0.951318
CD4	128	C.S	14	Spleen	22.47							C.S
CD4	128	C.S	14	Spleen	22.71	22.59	19.51		3.08		0.557	C.S	0.679714
CD4	129	C.H	14	Spleen	22.9							C.H
CD4	129	C.H	14	Spleen	23.1	23	20.135		2.865		0.342	C.H	0.788947
CD4	130	C.H	14	Spleen	22.04							C.H
CD4	130	C.H	14	Spleen	22.32	22.18	19.725		2.455		-0.068	C.H	1.04826
CD4	131	C.H	14	Spleen	22.39							C.H
CD4	131	C.H	14	Spleen	22.54	22.465	20.07		2.395		-0.128	C.H	1.09278
CD4	132	C.H	14	Spleen	23.56							C.H
CD4	132	C.H	14	Spleen	23.52	23.54	20.545		2.995		0.472	C.H	0.720964
CD4	133	C.H	14	Spleen	22.85							C.H
CD4	133	C.H	14	Spleen	23.03	22.94	20.015		2.925		0.402	C.H	0.756808
CD4	134	E.S	14	Spleen	22.65							E.S
CD4	134	E.S	14	Spleen	22.97	22.81	19.75		3.06		0.537	E.S	0.689203
CD4	135	E.S	14	Spleen	23.03							E.S
CD4	135	E.S	14	Spleen	23.33	23.18	21.215		1.965		-0.558	E.S	1.47223
CD4	136	E.S	14	Spleen	23.35							E.S
CD4	136	E.S	14	Spleen	23.58	23.465	20.47		2.995		0.472	E.S	0.720964
CD4	137	E.S	14	Spleen	23.11							E.S
CD4	137	E.S	14	Spleen	23.22	23.165	20.62		2.545		0.022	E.S	0.984866
CD4	138	E.S	14	Spleen	22.73							E.S
CD4	138	E.S	14	Spleen	22.89	22.81	19.955		2.855		0.332	E.S	0.794434
CD4	139	E.H	14	Spleen	22.03							E.H
CD4	139	E.H	14	Spleen	22.65	22.34	20.195		2.145		-0.378	E.H	1.29954
CD4	140	E.H	14	Spleen	22.51							E.H
CD4	140	E.H	14	Spleen	22.15	22.33	20.1		2.23		-0.293	E.H	1.22519
CD4	141	E.H	14	Spleen	22.05							E.H
CD4	141	E.H	14	Spleen	22.09	22.07	20.02		2.05		-0.473	E.H	1.38799
CD4	142	E.H	14	Spleen	21.6							E.H
CD4	142	E.H	14	Spleen	21.97	21.785	20.33		1.455		-1.068	E.H	2.09652
CD4	143	E.H	14	Spleen	22.31							E.H
CD4	143	E.H	14	Spleen	22.51	22.41	21.655		0.755		-1.768	E.H	3.40581
CD4	145	E.H	15	Spleen	22.21							E.H
CD4	145	E.H	15	Spleen	22.01	22.11	19.795		2.315		-0.208	E.H	1.15509
CD4	146	E.H	15	Spleen	21.32							E.H
CD4	146	E.H	15	Spleen	21.41	21.365	18.995		2.37		-0.153	E.H	1.11188
CD4	147	E.H	15	Spleen	21.28							E.H
CD4	147	E.H	15	Spleen	21.45	21.365	18.975		2.39		-0.133	E.H	1.09657
CD4	148	E.H	15	Spleen	21.19							E.H
CD4	148	E.H	15	Spleen	21.03	21.11	18.575		2.535		0.012	E.H	0.991717
CD4	153	E.H	15	Spleen	21.52							E.H
CD4	153	E.H	15	Spleen	21.72	21.62	19.215		2.405		-0.118	E.H	1.08523
CD4	154	E.S	15	Spleen	22.01							E.S
CD4	154	E.S	15	Spleen	22.21	22.11	18.99		3.12		0.597	E.S	0.661127
CD4	155	E.S	15	Spleen	22.13							E.S
CD4	155	E.S	15	Spleen	22.18	22.155	19.385		2.77		0.247	E.S	0.842647
CD4	156	E.S	15	Spleen	22.22							E.S
CD4	156	E.S	15	Spleen	22.29	22.255	19.23		3.025		0.502	E.S	0.706127
CD4	157	E.S	15	Spleen	23.01							E.S
CD4	157	E.S	15	Spleen	22.73	22.87	19.675		3.195		0.672	E.S	0.627636
CD4	158	E.S	15	Spleen	22.22							E.S
CD4	158	E.S	15	Spleen	22.22	22.22	19.225		2.995		0.472	E.S	0.720964
CD4	161	C.S	15	Spleen	21.51							C.S
CD4	161	C.S	15	Spleen	21.43	21.47	19.005		2.465		-0.058	C.S	1.04102
CD4	162	C.S	15	Spleen	22.11							C.S
CD4	162	C.S	15	Spleen	22.15	22.13	19.02		3.11		0.587	C.S	0.665726
CD4	163	C.S	15	Spleen	22.86							C.S
CD4	163	C.S	15	Spleen	22.97	22.915	19.465		3.45		0.927	C.S	0.525951
CD4	164	C.S	15	Spleen	22.34							C.S
CD4	164	C.S	15	Spleen	22.35	22.345	19.6		2.745		0.222	C.S	0.857376
CD4	165	C.S	15	Spleen	23.03							C.S
CD4	165	C.S	15	Spleen	22.96	22.995	19.72		3.275		0.752	C.S	0.59378
CD4	166	C.H	15	Spleen	22.64							C.H
CD4	166	C.H	15	Spleen	22.53	22.585	19.36		3.225		0.702	C.H	0.614719
CD4	167	C.H	15	Spleen	22.11							C.H
CD4	167	C.H	15	Spleen	22.16	22.135	19.265		2.87		0.347	C.H	0.786217
CD4	168	C.H	15	Spleen	22.93							C.H
CD4	168	C.H	15	Spleen	23	22.965	20.545		2.42		-0.103	C.H	1.074
CD4	169	C.H	15	Spleen	24.58							C.H
CD4	169	C.H	15	Spleen	24.69	24.635	21.5		3.135		0.612	C.H	0.654289
CD4	170	C.H	15	Spleen	21.76							C.H
CD4	170	C.H	15	Spleen	21.9	21.83	19.095		2.735		0.212	C.H	0.86334
CD4	179	C.S	21	Spleen	22.35							C.S
CD4	179	C.S	21	Spleen	22.55	22.45	19.61		2.84		0.317	C.S	0.802737
CD4	180	C.S	21	Spleen	22.8							C.S
CD4	180	C.S	21	Spleen	22.99	22.895	19.4		3.495		0.972	C.S	0.509799
CD4	181	C.S	21	Spleen	23.02							C.S
CD4	181	C.S	21	Spleen	23.13	23.075	19.81		3.265		0.742	C.S	0.59791
CD4	182	C.S	21	Spleen	23.4							C.S
CD4	182	C.S	21	Spleen	23.83	23.615	19.21		4.405		1.882	C.S	0.271307
CD4	183	C.S	21	Spleen	24.14							C.S
CD4	183	C.S	21	Spleen	23.47	23.805	20.24		3.565		1.042	C.S	0.485654
CD4	184	C.H	21	Spleen	22.06							C.H
CD4	184	C.H	21	Spleen	21.95	22.005	19.84		2.165		-0.358	C.H	1.28165
CD4	185	C.H	21	Spleen	22.16							C.H
CD4	185	C.H	21	Spleen	22.04	22.1	19.43		2.67		0.147	C.H	0.903127
CD4	186	C.H	21	Spleen	22.09							C.H
CD4	186	C.H	21	Spleen	22.06	22.075	19.52		2.555		0.032	C.H	0.978063
CD4	187	C.H	21	Spleen	22.23							C.H
CD4	187	C.H	21	Spleen	22.32	22.275	19.45		2.825		0.302	C.H	0.811127
CD4	188	C.H	21	Spleen	21.81							C.H
CD4	188	C.H	21	Spleen	21.62	21.715	19.57		2.145		-0.378	C.H	1.29954
CD4	189	E.S	21	Spleen	22.23							E.S
CD4	189	E.S	21	Spleen	22.3	22.265	19.15		3.115		0.592	E.S	0.663423
CD4	190	E.S	21	Spleen	21.9							E.S
CD4	190	E.S	21	Spleen	23	22.45	18.8		3.65		1.127	E.S	0.457867
CD4	191	E.S	21	Spleen	23.4							E.S
CD4	191	E.S	21	Spleen	23.77	23.585	19.58		4.005		1.482	E.S	0.357992
CD4	192	E.S	21	Spleen	22.57							E.S
CD4	192	E.S	21	Spleen	22.74	22.655	19.885		2.77		0.247	E.S	0.842647
CD4	193	E.S	21	Spleen	22.51							E.S
CD4	193	E.S	21	Spleen	22.45	22.48	20.01		2.47		-0.053	E.S	1.03742
CD4	194	C.S	28	Spleen	22.09							C.S
CD4	194	C.S	28	Spleen	22.2	22.145	18.6		3.545		1.022	C.S	0.492433
CD4	195	C.S	28	Spleen	22.16							C.S
CD4	195	C.S	28	Spleen	22.3	22.23	19.245		2.985		0.462	C.S	0.725979
CD4	196	C.S	28	Spleen	22.37							C.S
CD4	196	C.S	28	Spleen	22.47	22.42	19.22		3.2		0.677	C.S	0.625465
CD4	197	C.S	28	Spleen	23.12							C.S
CD4	197	C.S	28	Spleen	23.2	23.16	19.02		4.14		1.617	C.S	0.326013
CD4	198	C.S	28	Spleen	23.45							C.S
CD4	198	C.S	28	Spleen	23.61	23.53	19.43		4.1		1.577	C.S	0.335178
CD4	199	C.H	28	Spleen	22.12							C.H
CD4	199	C.H	28	Spleen	22.24	22.18	19.88		2.3		-0.223	C.H	1.16716
CD4	200	C.H	28	Spleen	21.91							C.H
CD4	200	C.H	28	Spleen	22.01	21.96	19.475		2.485		-0.038	C.H	1.02669
CD4	201	C.H	28	Spleen	21.09							C.H
CD4	201	C.H	28	Spleen	21.1	21.095	19.26		1.835		-0.688	C.H	1.61105
CD4	202	C.H	28	Spleen	23.93							C.H
CD4	202	C.H	28	Spleen	24.15	24.04	21.715		2.325		-0.198	C.H	1.14711
CD4	203	C.H	28	Spleen	22.22							C.H
CD4	203	C.H	28	Spleen	22.5	22.36	19.165		3.195		0.672	C.H	0.627636
CD4	204	E.S	28	Spleen	21.46							E.S
CD4	204	E.S	28	Spleen	21.71	21.585	19.445		2.14		-0.383	E.S	1.30405
CD4	205	E.S	28	Spleen	20.65							E.S
CD4	205	E.S	28	Spleen	20.9	20.775	18.88		1.895		-0.628	E.S	1.54542
CD4	206	E.S	28	Spleen	22.51							E.S
CD4	206	E.S	28	Spleen	22.62	22.565	19.33		3.235		0.712	E.S	0.610473
CD4	207	E.S	28	Spleen	21.99							E.S
CD4	207	E.S	28	Spleen	22.41	22.2	19.415		2.785		0.262	E.S	0.833931
CD4	208	E.S	28	Spleen	23.25							E.S
CD4	208	E.S	28	Spleen	23.8	23.525	19.885		3.64		1.117	E.S	0.461052

## Sheet: IFG-G - ddCt
Target	Sample	Group	DPE	Biological Set Name	Cq (IFN-G)	Cq Mean (IFN-G)	Cq Mean (EF1a)		dCt		ddCt		2^-ddCt
INF-G	43	C.S	1	Spleen	30.33
INF-G	43	C.S	1	Spleen	30.12	30.225	20.8		9.425		-0.298		1.22944
INF-G	44	C.S	1	Spleen	29.96
INF-G	44	C.S	1	Spleen	29.99	29.975	20.325		9.65		-0.073		1.0519
INF-G	45	C.S	1	Spleen	30.26
INF-G	45	C.S	1	Spleen	31.13	30.695	19.905		10.79		1.067		0.477311
INF-G	46	C.S	1	Spleen	29.07
INF-G	46	C.S	1	Spleen	29.21	29.14	19.695		9.445		-0.278		1.21251
INF-G	47	C.S	1	Spleen	29.12
INF-G	47	C.S	1	Spleen	29.52	29.32	20.015		9.305	9.723	-0.418		1.33607	1.06145
INF-G	48	C.H	1	Spleen	36.18
INF-G	48	C.H	1	Spleen	35.18	35.68	22.755		12.925		3.202		0.108668
INF-G	49	C.H	1	Spleen	30.62
INF-G	49	C.H	1	Spleen	30.62	30.62	20.115		10.505		0.782		0.58156
INF-G	50	C.H	1	Spleen	30.95
INF-G	50	C.H	1	Spleen	31	30.975	20.39		10.585		0.862		0.550189
INF-G	51	C.H	1	Spleen	30.6
INF-G	51	C.H	1	Spleen	28.81	29.705	19.85		9.855		0.132		0.912565
INF-G	52	C.H	1	Spleen	29.95
INF-G	52	C.H	1	Spleen	30.03	29.99	20.055		9.935		0.212		0.86334
INF-G	53	E.S	1	Spleen	28.86
INF-G	53	E.S	1	Spleen	28.69	28.775	19.615		9.16		-0.563		1.47734
INF-G	54	E.S	1	Spleen	29.73
INF-G	54	E.S	1	Spleen	29.93	29.83	19.785		10.045		0.322		0.79996
INF-G	55	E.S	1	Spleen	31.07
INF-G	55	E.S	1	Spleen	31.09	31.08	20.19		10.89		1.167		0.445346
INF-G	56	E.S	1	Spleen	31.19
INF-G	56	E.S	1	Spleen	31.44	31.315	19.695		11.62		1.897		0.268501
INF-G	57	E.S	1	Spleen	30.25
INF-G	57	E.S	1	Spleen	29.54	29.895	20.115		9.78		0.057		0.961261
INF-G	58	E.H	1	Spleen	30.33
INF-G	58	E.H	1	Spleen	30.05	30.19	19.885		10.305		0.582		0.668037
INF-G	59	E.H	1	Spleen	30.36
INF-G	59	E.H	1	Spleen	30.87	30.615	20.145		10.47		0.747		0.595841
INF-G	60	E.H	1	Spleen	32.15
INF-G	60	E.H	1	Spleen	32.45	32.3	19.71		12.59		2.867		0.137071
INF-G	61	E.H	1	Spleen	31.38
INF-G	61	E.H	1	Spleen	31.27	31.325	19.895		11.43		1.707		0.306296
INF-G	62	E.H	1	Spleen	30.52
INF-G	62	E.H	1	Spleen	30.37	30.445	19.535		10.91		1.187		0.439215
INF-G	63	C.S	3	Spleen	30.13
INF-G	63	C.S	3	Spleen	30.48	30.305	19.41		10.895		1.172		0.443806
INF-G	64	C.S	3	Spleen	29.02
INF-G	64	C.S	3	Spleen	29.44	29.23	19.175		10.055		0.332		0.794434
INF-G	65	C.S	3	Spleen	29.09
INF-G	65	C.S	3	Spleen	29.17	29.13	19.575		9.555		-0.168		1.1235
INF-G	66	C.S	3	Spleen	30.19
INF-G	66	C.S	3	Spleen	30.56	30.375	20.785		9.59		-0.133		1.09657
INF-G	67	C.S	3	Spleen	29.52
INF-G	67	C.S	3	Spleen	29.49	29.505	19.665		9.84		0.117		0.922103
INF-G	68	C.H	3	Spleen	30.38
INF-G	68	C.H	3	Spleen	30.53	30.455	19.875		10.58		0.857		0.552099
INF-G	69	C.H	3	Spleen	29.4
INF-G	69	C.H	3	Spleen	29.43	29.415	19.465		9.95		0.227		0.85441
INF-G	70	C.H	3	Spleen	31.37
INF-G	70	C.H	3	Spleen	32.15	31.76	21.985		9.775		0.052		0.964598
INF-G	71	C.H	3	Spleen	30.09
INF-G	71	C.H	3	Spleen	30.54	30.315	19.765		10.55		0.827		0.5637
INF-G	72	C.H	3	Spleen	29.55
INF-G	72	C.H	3	Spleen	29.15	29.35	19.47		9.88		0.157		0.896888
INF-G	73	E.S	3	Spleen	29.92
INF-G	73	E.S	3	Spleen	30.34	30.13	19.5		10.63		0.907		0.533293
INF-G	74	E.S	3	Spleen	29.03
INF-G	74	E.S	3	Spleen	29.61	29.32	19.345		9.975		0.252		0.839731
INF-G	75	E.S	3	Spleen	29.5
INF-G	75	E.S	3	Spleen	29.85	29.675	19.63		10.045		0.322		0.79996
INF-G	76	E.S	3	Spleen	30.02
INF-G	76	E.S	3	Spleen	30.39	30.205	22.23		7.975		-1.748		3.35893
INF-G	77	E.S	3	Spleen	29.2
INF-G	77	E.S	3	Spleen	29.34	29.27	19.8		9.47		-0.253		1.19168
INF-G	78	E.H	3	Spleen	29.41
INF-G	78	E.H	3	Spleen	29.46	29.435	20.14		9.295		-0.428		1.34537
INF-G	79	E.H	3	Spleen	29.83
INF-G	79	E.H	3	Spleen	29.52	29.675	20.73		8.945		-0.778		1.71475
INF-G	80	E.H	3	Spleen	30.38
INF-G	80	E.H	3	Spleen	30.18	30.28	19.26		11.02		1.297		0.406972
INF-G	81	E.H	3	Spleen	29.4
INF-G	81	E.H	3	Spleen	28.83	29.115	19.435		9.68		-0.043		1.03025
INF-G	82	E.H	3	Spleen	29.79
INF-G	82	E.H	3	Spleen	30.46	30.125	19.595		10.53		0.807		0.571569
INF-G	83	C.S	7	Spleen	30.73
INF-G	83	C.S	7	Spleen	30.54	30.635	19.96		10.675		0.952		0.516915
INF-G	84	C.S	7	Spleen	29.33
INF-G	84	C.S	7	Spleen	29.2	29.265	19.33		9.935		0.212		0.86334
INF-G	85	C.S	7	Spleen	28.64
INF-G	85	C.S	7	Spleen	28.87	28.755	19.39		9.365		-0.358		1.28165
INF-G	86	C.S	7	Spleen	26.8
INF-G	86	C.S	7	Spleen	26.83	26.815	19.065		7.75		-1.973		3.92584
INF-G	87	C.S	7	Spleen	29.93
INF-G	87	C.S	7	Spleen	29.68	29.805	19.14		10.665		0.942		0.520511
INF-G	88	C.H	7	Spleen	29.68
INF-G	88	C.H	7	Spleen	30.08	29.88	19.31		10.57		0.847		0.55594
INF-G	89	C.H	7	Spleen	29.88
INF-G	89	C.H	7	Spleen	29.88	29.88	19.4		10.48		0.757		0.591726
INF-G	90	C.H	7	Spleen	31.74
INF-G	90	C.H	7	Spleen	30.64	31.19	19.86		11.33		1.607		0.32828
INF-G	91	C.H	7	Spleen	34.91
INF-G	91	C.H	7	Spleen	33.85	34.38	23.515		10.865		1.142		0.453131
INF-G	92	C.H	7	Spleen	29.85
INF-G	92	C.H	7	Spleen	30.1	29.975	19.82		10.155		0.432		0.741234
INF-G	93	E.S	7	Spleen	28.76
INF-G	93	E.S	7	Spleen	28.79	28.775	19.075		9.7		-0.023		1.01607
INF-G	94	E.S	7	Spleen	27.12
INF-G	94	E.S	7	Spleen	27.22	27.17	20.42		6.75		-2.973		7.85167
INF-G	95	E.S	7	Spleen	28.97
INF-G	95	E.S	7	Spleen	28.78	28.875	18.85		10.025		0.302		0.811127
INF-G	96	E.S	7	Spleen	29.32
INF-G	96	E.S	7	Spleen	29.63	29.475	20.115		9.36		-0.363		1.2861
INF-G	97	E.S	7	Spleen	29.07
INF-G	97	E.S	7	Spleen	28.79	28.93	20.87		8.06		-1.663		3.16674
INF-G	98	E.H	7	Spleen	28.29
INF-G	98	E.H	7	Spleen	28.9	28.595	19.59		9.005		-0.718		1.6449
INF-G	99	E.H	7	Spleen	28.85
INF-G	99	E.H	7	Spleen	28.29	28.57	19.44		9.13		-0.593		1.50838
INF-G	100	E.H	7	Spleen	29.19
INF-G	100	E.H	7	Spleen	28.7	28.945	20.57		8.375		-1.348		2.54559
INF-G	101	E.H	7	Spleen	28.06
INF-G	101	E.H	7	Spleen	28.04	28.05	18.895		9.155		-0.568		1.48247
INF-G	102	E.H	7	Spleen	28.58
INF-G	102	E.H	7	Spleen	28.48	28.53	19.08		9.45		-0.273		1.20832
INF-G	104	C.S	10	Spleen	29.02
INF-G	104	C.S	10	Spleen	28.92	28.97	18.76		10.21		0.487		0.713507
INF-G	105	C.S	10	Spleen	30.52
INF-G	105	C.S	10	Spleen	30.46	30.49	19.41		11.08		1.357		0.390393
INF-G	106	C.S	10	Spleen	29.34
INF-G	106	C.S	10	Spleen	29.78	29.56	19.265		10.295		0.572		0.672684
INF-G	107	C.S	10	Spleen	30.03
INF-G	107	C.S	10	Spleen	29.51	29.77	19.57		10.2		0.477		0.71847
INF-G	108	C.S	10	Spleen	29.87
INF-G	108	C.S	10	Spleen	30.23	30.05	19.915		10.135		0.412		0.751581
INF-G	109	C.H	10	Spleen	29.37
INF-G	109	C.H	10	Spleen	30	29.685	19.675		10.01		0.287		0.819605
INF-G	110	C.H	10	Spleen	29.46
INF-G	110	C.H	10	Spleen	29.38	29.42	20.54		8.88		-0.843		1.79378
INF-G	111	C.H	10	Spleen	29.57
INF-G	111	C.H	10	Spleen	29.72	29.645	19.32		10.325		0.602		0.65884
INF-G	112	C.H	10	Spleen	28.49
INF-G	112	C.H	10	Spleen	28.74	28.615	19.105		9.51		-0.213		1.1591
INF-G	113	C.H	10	Spleen	28.02
INF-G	113	C.H	10	Spleen	28.05	28.035	19.155		8.88		-0.843		1.79378
INF-G	114	E.S	10	Spleen	28.33
INF-G	114	E.S	10	Spleen	27.54	27.935	19.515		8.42		-1.303		2.46741
INF-G	115	E.S	10	Spleen	29.07
INF-G	115	E.S	10	Spleen	28.96	29.015	19.65		9.365		-0.358		1.28165
INF-G	116	E.S	10	Spleen	29.15
INF-G	116	E.S	10	Spleen	28.56	28.855	19.57		9.285		-0.438		1.35472
INF-G	117	E.S	10	Spleen	29.21
INF-G	117	E.S	10	Spleen	29.02	29.115	19.265		9.85		0.127		0.915734
INF-G	118	E.S	10	Spleen	27.45
INF-G	118	E.S	10	Spleen	27.59	27.52	19.355		8.165		-1.558		2.94445
INF-G	119	E.H	10	Spleen	26.37
INF-G	119	E.H	10	Spleen	26.07	26.22	18.815		7.405		-2.318		4.9864
INF-G	120	E.H	10	Spleen	27.23
INF-G	120	E.H	10	Spleen	27.15	27.19	19.285		7.905		-1.818		3.52592
INF-G	121	E.H	10	Spleen	27.24
INF-G	121	E.H	10	Spleen	27.07	27.155	19.125		8.03		-1.693		3.23328
INF-G	122	E.H	10	Spleen	26.12
INF-G	122	E.H	10	Spleen	26.56	26.34	19.255		7.085		-2.638		6.22468
INF-G	123	E.H	10	Spleen	27.99
INF-G	123	E.H	10	Spleen	27.4	27.695	19.645		8.05		-1.673		3.18877
INF-G	124	C.S	14	Spleen	31.05
INF-G	124	C.S	14	Spleen	31.01	31.03	20.63		10.4		0.677		0.625465
INF-G	125	C.S	14	Spleen	30.35
INF-G	125	C.S	14	Spleen	30.66	30.505	20.015		10.49		0.767		0.587638
INF-G	126	C.S	14	Spleen	28.07
INF-G	126	C.S	14	Spleen	28.22	28.145	19.8		8.345		-1.378		2.59908
INF-G	127	C.S	14	Spleen	30.93
INF-G	127	C.S	14	Spleen	30.56	30.745	20.6		10.145		0.422		0.746389
INF-G	128	C.S	14	Spleen	29.04
INF-G	128	C.S	14	Spleen	28.8	28.92	19.51		9.41		-0.313		1.24229
INF-G	129	C.H	14	Spleen	29.59
INF-G	129	C.H	14	Spleen	29.95	29.77	20.135		9.635		-0.088		1.0629
INF-G	130	C.H	14	Spleen	29.46
INF-G	130	C.H	14	Spleen	29.08	29.27	19.725		9.545		-0.178		1.13131
INF-G	131	C.H	14	Spleen	29.31
INF-G	131	C.H	14	Spleen	29.79	29.55	20.07		9.48		-0.243		1.18345
INF-G	132	C.H	14	Spleen	27.5
INF-G	132	C.H	14	Spleen	27.16	27.33	20.545		6.785		-2.938		7.66348
INF-G	133	C.H	14	Spleen	26.82
INF-G	133	C.H	14	Spleen	26.88	26.85	20.015		6.835		-2.888		7.40244
INF-G	134	E.S	14	Spleen	29.23
INF-G	134	E.S	14	Spleen	29.38	29.305	19.75		9.555		-0.168		1.1235
INF-G	135	E.S	14	Spleen	28.26
INF-G	135	E.S	14	Spleen	28.29	28.275	21.215		7.06		-2.663		6.33349
INF-G	136	E.S	14	Spleen	28.86
INF-G	136	E.S	14	Spleen	28.91	28.885	20.47		8.415		-1.308		2.47598
INF-G	137	E.S	14	Spleen	30
INF-G	137	E.S	14	Spleen	29.73	29.865	20.62		9.245		-0.478		1.39281
INF-G	138	E.S	14	Spleen	29.96
INF-G	138	E.S	14	Spleen	29.57	29.765	19.955		9.81		0.087		0.941478
INF-G	139	E.H	14	Spleen	27.47
INF-G	139	E.H	14	Spleen	28.5	27.985	20.195		7.79		-1.933		3.81848
INF-G	140	E.H	14	Spleen	26.71
INF-G	140	E.H	14	Spleen	26.21	26.46	20.1		6.36		-3.363		10.2888
INF-G	141	E.H	14	Spleen	25.85
INF-G	141	E.H	14	Spleen	25.67	25.76	20.02		5.74		-3.983		15.8126
INF-G	142	E.H	14	Spleen	25.71
INF-G	142	E.H	14	Spleen	25.61	25.66	20.33		5.33		-4.393		21.0099
INF-G	143	E.H	14	Spleen	29.81
INF-G	143	E.H	14	Spleen	30.1	29.955	21.655		8.3		-1.423		2.68143
INF-G	145	E.H	15	Spleen	27.27
INF-G	145	E.H	15	Spleen	27.25	27.26	19.795		7.465		-2.258		4.78328
INF-G	146	E.H	15	Spleen	25.4
INF-G	146	E.H	15	Spleen	25.46	25.43	18.995		6.435		-3.288		9.76757
INF-G	147	E.H	15	Spleen	26.99
INF-G	147	E.H	15	Spleen	27	26.995	18.975		8.02		-1.703		3.25577
INF-G	148	E.H	15	Spleen	25.63
INF-G	148	E.H	15	Spleen	25.37	25.5	18.575		6.925		-2.798		6.95476
INF-G	153	E.H	15	Spleen	25.48
INF-G	153	E.H	15	Spleen	25.74	25.61	19.215		6.395		-3.328		10.0422
INF-G	154	E.S	15	Spleen	27.95
INF-G	154	E.S	15	Spleen	27.98	27.965	18.99		8.975		-0.748		1.67946
INF-G	155	E.S	15	Spleen	28.48
INF-G	155	E.S	15	Spleen	28.88	28.68	19.385		9.295		-0.428		1.34537
INF-G	156	E.S	15	Spleen	28.84
INF-G	156	E.S	15	Spleen	28.38	28.61	19.23		9.38		-0.343		1.26839
INF-G	157	E.S	15	Spleen	29.2
INF-G	157	E.S	15	Spleen	29.47	29.335	19.675		9.66		-0.063		1.04464
INF-G	158	E.S	15	Spleen	28.53
INF-G	158	E.S	15	Spleen	29.12	28.825	19.225		9.6		-0.123		1.089
INF-G	161	C.S	15	Spleen	30.04
INF-G	161	C.S	15	Spleen	30.19	30.115	19.005		11.11		1.387		0.382359
INF-G	162	C.S	15	Spleen	30.33
INF-G	162	C.S	15	Spleen	30.3	30.315	19.02		11.295		1.572		0.336342
INF-G	163	C.S	15	Spleen	29.4
INF-G	163	C.S	15	Spleen	29.84	29.62	19.465		10.155		0.432		0.741234
INF-G	164	C.S	15	Spleen	30.11
INF-G	164	C.S	15	Spleen	29.78	29.945	19.6		10.345		0.622		0.64977
INF-G	165	C.S	15	Spleen	29.93
INF-G	165	C.S	15	Spleen	29.97	29.95	19.72		10.23		0.507		0.703684
INF-G	166	C.H	15	Spleen	27.29
INF-G	166	C.H	15	Spleen	27.28	27.285	19.36		7.925		-1.798		3.47738
INF-G	167	C.H	15	Spleen	28.17
INF-G	167	C.H	15	Spleen	28.4	28.285	19.265		9.02		-0.703		1.62789
INF-G	168	C.H	15	Spleen	27.84
INF-G	168	C.H	15	Spleen	27.54	27.69	20.545		7.145		-2.578		5.97111
INF-G	169	C.H	15	Spleen	27.39
INF-G	169	C.H	15	Spleen	27.91	27.65	21.5		6.15		-3.573		11.9009
INF-G	170	C.H	15	Spleen	26.16
INF-G	170	C.H	15	Spleen	26.15	26.155	19.095		7.06		-2.663		6.33349
INF-G	179	C.S	21	Spleen	30.38
INF-G	179	C.S	21	Spleen	30.06	30.22	19.61		10.61		0.887		0.540737
INF-G	180	C.S	21	Spleen	29.26
INF-G	180	C.S	21	Spleen	29.4	29.33	19.4		9.93		0.207		0.866337
INF-G	181	C.S	21	Spleen	30.49
INF-G	181	C.S	21	Spleen	30.58	30.535	19.81		10.725		1.002		0.499307
INF-G	182	C.S	21	Spleen	29.4
INF-G	182	C.S	21	Spleen	29.69	29.545	19.21		10.335		0.612		0.654289
INF-G	183	C.S	21	Spleen	30.92
INF-G	183	C.S	21	Spleen	30.26	30.59	20.24		10.35		0.627		0.647521
INF-G	184	C.H	21	Spleen	26.28
INF-G	184	C.H	21	Spleen	26.9	26.59	19.84		6.75		-2.973		7.85167
INF-G	185	C.H	21	Spleen	27.75
INF-G	185	C.H	21	Spleen	27.48	27.615	19.43		8.185		-1.538		2.90392
INF-G	186	C.H	21	Spleen	27.54
INF-G	186	C.H	21	Spleen	27.56	27.55	19.52		8.03		-1.693		3.23328
INF-G	187	C.H	21	Spleen	26.8
INF-G	187	C.H	21	Spleen	26.95	26.875	19.45		7.425		-2.298		4.91776
INF-G	188	C.H	21	Spleen	28.47
INF-G	188	C.H	21	Spleen	28.41	28.44	19.57		8.87		-0.853		1.80625
INF-G	189	E.S	21	Spleen	29.12
INF-G	189	E.S	21	Spleen	28.95	29.035	19.15		9.885		0.162		0.893785
INF-G	190	E.S	21	Spleen	28.85
INF-G	190	E.S	21	Spleen	29.75	29.3	18.8		10.5		0.777		0.583579
INF-G	191	E.S	21	Spleen	29.43
INF-G	191	E.S	21	Spleen	29.3	29.365	19.58		9.785		0.062		0.957935
INF-G	192	E.S	21	Spleen	29.41
INF-G	192	E.S	21	Spleen	29.15	29.28	19.885		9.395		-0.328		1.25527
INF-G	193	E.S	21	Spleen	29.12
INF-G	193	E.S	21	Spleen	29.05	29.085	20.01		9.075		-0.648		1.56699
INF-G	194	C.S	28	Spleen	28.58
INF-G	194	C.S	28	Spleen	28.38	28.48	18.6		9.88		0.157		0.896888
INF-G	195	C.S	28	Spleen	29.42
INF-G	195	C.S	28	Spleen	30	29.71	19.245		10.465		0.742		0.59791
INF-G	196	C.S	28	Spleen	28.65
INF-G	196	C.S	28	Spleen	28.77	28.71	19.22		9.49		-0.233		1.17528
INF-G	197	C.S	28	Spleen	28.7
INF-G	197	C.S	28	Spleen	28.69	28.695	19.02		9.675		-0.048		1.03383
INF-G	198	C.S	28	Spleen	28.43
INF-G	198	C.S	28	Spleen	28.28	28.355	19.43		8.925		-0.798		1.73869
INF-G	199	C.H	28	Spleen	28.14
INF-G	199	C.H	28	Spleen	28.4	28.27	19.88		8.39		-1.333		2.51926
INF-G	200	C.H	28	Spleen	27.71
INF-G	200	C.H	28	Spleen	27.52	27.615	19.475		8.14		-1.583		2.99592
INF-G	201	C.H	28	Spleen	27.6
INF-G	201	C.H	28	Spleen	27.6	27.6	19.26		8.34		-1.383		2.6081
INF-G	202	C.H	28	Spleen	27.41
INF-G	202	C.H	28	Spleen	27.31	27.36	21.715		5.645		-4.078		16.8889
INF-G	203	C.H	28	Spleen	26.52
INF-G	203	C.H	28	Spleen	26.15	26.335	19.165		7.17		-2.553		5.86853
INF-G	204	E.S	28	Spleen	28.96
INF-G	204	E.S	28	Spleen	28.6	28.78	19.445		9.335		-0.388		1.30858
INF-G	205	E.S	28	Spleen	28.16
INF-G	205	E.S	28	Spleen	28.04	28.1	18.88		9.22		-0.503		1.41716
INF-G	206	E.S	28	Spleen	29.02
INF-G	206	E.S	28	Spleen	29.35	29.185	19.33		9.855		0.132		0.912565
INF-G	207	E.S	28	Spleen	27.66
INF-G	207	E.S	28	Spleen	28.34	28	19.415		8.585		-1.138		2.20076
INF-G	208	E.S	28	Spleen	29.16
INF-G	208	E.S	28	Spleen	29.76	29.46	19.885		9.575		-0.148		1.10803

## Sheet: GzmA - ddCt
Target	Sample	Group	DPE	Biological Set Name	Cq (GzmA)	Cq Mean (GzmA)	Cq Mean (EF1a)		dCt		ddCt		2^-ddCt
GzmA	43	C.S	1	Spleen	31.49
GzmA	43	C.S	1	Spleen	31.39	31.44	20.8		10.64		-0.522		1.43594
GzmA	44	C.S	1	Spleen	32.14
GzmA	44	C.S	1	Spleen	31.61	31.875	20.325		11.55		0.388		0.764188
GzmA	45	C.S	1	Spleen	31.83
GzmA	45	C.S	1	Spleen	32.24	32.035	19.905		12.13		0.968		0.511214
GzmA	46	C.S	1	Spleen	30.47
GzmA	46	C.S	1	Spleen	30.36	30.415	19.695		10.72		-0.442		1.35849
GzmA	47	C.S	1	Spleen	30.66
GzmA	47	C.S	1	Spleen	30.91	30.785	20.015		10.77	11.162	-0.392		1.31221	1.07641
GzmA	48	C.H	1	Spleen	35.27
GzmA	48	C.H	1	Spleen	35.78	35.525	22.755		12.77		1.608		0.328053
GzmA	49	C.H	1	Spleen	31.86
GzmA	49	C.H	1	Spleen	32.29	32.075	20.115		11.96		0.798		0.575146
GzmA	50	C.H	1	Spleen	31.91
GzmA	50	C.H	1	Spleen	31.23	31.57	20.39		11.18		0.018		0.987601
GzmA	51	C.H	1	Spleen	31.11
GzmA	51	C.H	1	Spleen	31.36	31.235	19.85		11.385		0.223		0.856782
GzmA	52	C.H	1	Spleen	32.1
GzmA	52	C.H	1	Spleen	32.73	32.415	20.055		12.36		1.198		0.435879
GzmA	53	E.S	1	Spleen	30.07
GzmA	53	E.S	1	Spleen	30.39	30.23	19.615		10.615		-0.547		1.46104
GzmA	54	E.S	1	Spleen	30.93
GzmA	54	E.S	1	Spleen	30.79	30.86	19.785		11.075		-0.087		1.06216
GzmA	55	E.S	1	Spleen	32.15
GzmA	55	E.S	1	Spleen	32.32	32.235	20.19		12.045		0.883		0.542239
GzmA	56	E.S	1	Spleen	32.53
GzmA	56	E.S	1	Spleen	31.14	31.835	19.695		12.14		0.978		0.507683
GzmA	57	E.S	1	Spleen	31.25
GzmA	57	E.S	1	Spleen	30.62	30.935	20.115		10.82		-0.342		1.26751
GzmA	58	E.H	1	Spleen	N/A
GzmA	58	E.H	1	Spleen	31.96	31.96	19.885		12.075		0.913		0.53108
GzmA	59	E.H	1	Spleen	31.41
GzmA	59	E.H	1	Spleen	31.8	31.605	20.145		11.46		0.298		0.813379
GzmA	60	E.H	1	Spleen	31.1
GzmA	60	E.H	1	Spleen	30.81	30.955	19.71		11.245		0.083		0.944092
GzmA	61	E.H	1	Spleen	32.32
GzmA	61	E.H	1	Spleen	N/A	32.32	19.895		12.425		1.263		0.416677
GzmA	62	E.H	1	Spleen	31.5
GzmA	62	E.H	1	Spleen	31.2	31.35	19.535		11.815		0.653		0.635957
GzmA	63	C.S	3	Spleen	29.61
GzmA	63	C.S	3	Spleen	29.88	29.745	19.41		10.335		-0.827		1.77399
GzmA	64	C.S	3	Spleen	30.4
GzmA	64	C.S	3	Spleen	30.07	30.235	19.175		11.06		-0.102		1.07326
GzmA	65	C.S	3	Spleen	28.58
GzmA	65	C.S	3	Spleen	29.21	28.895	19.575		9.32		-1.842		3.58507
GzmA	66	C.S	3	Spleen	32.56
GzmA	66	C.S	3	Spleen	32.16	32.36	20.785		11.575		0.413		0.75106
GzmA	67	C.S	3	Spleen	29.31
GzmA	67	C.S	3	Spleen	29.42	29.365	19.665		9.7		-1.462		2.7549
GzmA	68	C.H	3	Spleen	30.8
GzmA	68	C.H	3	Spleen	30.81	30.805	19.875		10.93		-0.232		1.17446
GzmA	69	C.H	3	Spleen	30.21
GzmA	69	C.H	3	Spleen	30.33	30.27	19.465		10.805		-0.357		1.28076
GzmA	70	C.H	3	Spleen	34.58
GzmA	70	C.H	3	Spleen	34.14	34.36	21.985		12.375		1.213		0.431371
GzmA	71	C.H	3	Spleen	32.56
GzmA	71	C.H	3	Spleen	31.6	32.08	19.765		12.315		1.153		0.449689
GzmA	72	C.H	3	Spleen	30.76
GzmA	72	C.H	3	Spleen	31.32	31.04	19.47		11.57		0.408		0.753667
GzmA	73	E.S	3	Spleen	29.84
GzmA	73	E.S	3	Spleen	30.11	29.975	19.5		10.475		-0.687		1.60993
GzmA	74	E.S	3	Spleen	28.73
GzmA	74	E.S	3	Spleen	29.8	29.265	19.345		9.92		-1.242		2.36526
GzmA	75	E.S	3	Spleen	30.05
GzmA	75	E.S	3	Spleen	29.44	29.745	19.63		10.115		-1.047		2.06623
GzmA	76	E.S	3	Spleen	32.09
GzmA	76	E.S	3	Spleen	32.15	32.12	22.23		9.89		-1.272		2.41496
GzmA	77	E.S	3	Spleen	30.86
GzmA	77	E.S	3	Spleen	31.1	30.98	19.8		11.18		0.018		0.987601
GzmA	78	E.H	3	Spleen	31.86
GzmA	78	E.H	3	Spleen	31.36	31.61	20.14		11.47		0.308		0.807761
GzmA	79	E.H	3	Spleen	33.71
GzmA	79	E.H	3	Spleen	32.49	33.1	20.73		12.37		1.208		0.432868
GzmA	80	E.H	3	Spleen	30.51
GzmA	80	E.H	3	Spleen	30.18	30.345	19.26		11.085		-0.077		1.05482
GzmA	81	E.H	3	Spleen	30.31
GzmA	81	E.H	3	Spleen	31.02	30.665	19.435		11.23		0.068		0.95396
GzmA	82	E.H	3	Spleen	32.03
GzmA	82	E.H	3	Spleen	31.94	31.985	19.595		12.39		1.228		0.426909
GzmA	83	C.S	7	Spleen	31.65
GzmA	83	C.S	7	Spleen	31.51	31.58	19.96		11.62		0.458		0.727995
GzmA	84	C.S	7	Spleen	30.47
GzmA	84	C.S	7	Spleen	30.67	30.57	19.33		11.24		0.078		0.94737
GzmA	85	C.S	7	Spleen	31.2
GzmA	85	C.S	7	Spleen	31.35	31.275	19.39		11.885		0.723		0.605836
GzmA	86	C.S	7	Spleen	27.51
GzmA	86	C.S	7	Spleen	27.73	27.62	19.065		8.555		-2.607		6.09235
GzmA	87	C.S	7	Spleen	30.74
GzmA	87	C.S	7	Spleen	30.84	30.79	19.14		11.65		0.488		0.713013
GzmA	88	C.H	7	Spleen	30.46
GzmA	88	C.H	7	Spleen	30.38	30.42	19.31		11.11		-0.052		1.0367
GzmA	89	C.H	7	Spleen	30.33
GzmA	89	C.H	7	Spleen	30.69	30.51	19.4		11.11		-0.052		1.0367
GzmA	90	C.H	7	Spleen	31.13
GzmA	90	C.H	7	Spleen	31.12	31.125	19.86		11.265		0.103		0.931095
GzmA	91	C.H	7	Spleen	34.32
GzmA	91	C.H	7	Spleen	34.73	34.525	23.515		11.01		-0.152		1.11111
GzmA	92	C.H	7	Spleen	30.92
GzmA	92	C.H	7	Spleen	30.99	30.955	19.82		11.135		-0.027		1.01889
GzmA	93	E.S	7	Spleen	30.49
GzmA	93	E.S	7	Spleen	30.55	30.52	19.075		11.445		0.283		0.82188
GzmA	94	E.S	7	Spleen	27.58
GzmA	94	E.S	7	Spleen	27.77	27.675	20.42		7.255		-3.907		15.0011
GzmA	95	E.S	7	Spleen	30.31
GzmA	95	E.S	7	Spleen	30.44	30.375	18.85		11.525		0.363		0.777546
GzmA	96	E.S	7	Spleen	30.94
GzmA	96	E.S	7	Spleen	31.21	31.075	20.115		10.96		-0.202		1.15029
GzmA	97	E.S	7	Spleen	29.23
GzmA	97	E.S	7	Spleen	29.35	29.29	20.87		8.42		-2.742		6.68997
GzmA	98	E.H	7	Spleen	31.85
GzmA	98	E.H	7	Spleen	32.16	32.005	19.59		12.415		1.253		0.419575
GzmA	99	E.H	7	Spleen	31.3
GzmA	99	E.H	7	Spleen	31.02	31.16	19.44		11.72		0.558		0.679243
GzmA	100	E.H	7	Spleen	30.37
GzmA	100	E.H	7	Spleen	30.42	30.395	20.57		9.825		-1.337		2.52625
GzmA	101	E.H	7	Spleen	29.52
GzmA	101	E.H	7	Spleen	29.37	29.445	18.895		10.55		-0.612		1.52838
GzmA	102	E.H	7	Spleen	30.99
GzmA	102	E.H	7	Spleen	30.97	30.98	19.08		11.9		0.738		0.59957
GzmA	104	C.S	10	Spleen	30.43
GzmA	104	C.S	10	Spleen	30.19	30.31	18.76		11.55		0.388		0.764188
GzmA	105	C.S	10	Spleen	30.75
GzmA	105	C.S	10	Spleen	31	30.875	19.41		11.465		0.303		0.810565
GzmA	106	C.S	10	Spleen	31.07
GzmA	106	C.S	10	Spleen	31.03	31.05	19.265		11.785		0.623		0.649319
GzmA	107	C.S	10	Spleen	31.66
GzmA	107	C.S	10	Spleen	32.16	31.91	19.57		12.34		1.178		0.441964
GzmA	108	C.S	10	Spleen	31.2
GzmA	108	C.S	10	Spleen	31.19	31.195	19.915		11.28		0.118		0.921464
GzmA	109	C.H	10	Spleen	31.49
GzmA	109	C.H	10	Spleen	30.91	31.2	19.675		11.525		0.363		0.777546
GzmA	110	C.H	10	Spleen	29.89
GzmA	110	C.H	10	Spleen	29.79	29.84	20.54		9.3		-1.862		3.63511
GzmA	111	C.H	10	Spleen	30.49
GzmA	111	C.H	10	Spleen	30.32	30.405	19.32		11.085		-0.077		1.05482
GzmA	112	C.H	10	Spleen	30.76
GzmA	112	C.H	10	Spleen	30.74	30.75	19.105		11.645		0.483		0.715488
GzmA	113	C.H	10	Spleen	30.08
GzmA	113	C.H	10	Spleen	30.36	30.22	19.155		11.065		-0.097		1.06955
GzmA	114	E.S	10	Spleen	29.07
GzmA	114	E.S	10	Spleen	28.29	28.68	19.515		9.165		-1.997		3.99169
GzmA	115	E.S	10	Spleen	29.8
GzmA	115	E.S	10	Spleen	29.7	29.75	19.65		10.1		-1.062		2.08782
GzmA	116	E.S	10	Spleen	29.81
GzmA	116	E.S	10	Spleen	29.45	29.63	19.57		10.06		-1.102		2.14652
GzmA	117	E.S	10	Spleen	30.15
GzmA	117	E.S	10	Spleen	30.68	30.415	19.265		11.15		-0.012		1.00835
GzmA	118	E.S	10	Spleen	28.33
GzmA	118	E.S	10	Spleen	28.7	28.515	19.355		9.16		-2.002		4.00555
GzmA	119	E.H	10	Spleen	28.9
GzmA	119	E.H	10	Spleen	29.35	29.125	18.815		10.31		-0.852		1.805
GzmA	120	E.H	10	Spleen	31.21
GzmA	120	E.H	10	Spleen	31.17	31.19	19.285		11.905		0.743		0.597496
GzmA	121	E.H	10	Spleen	27.04
GzmA	121	E.H	10	Spleen	26.88	26.96	19.125		7.835		-3.327		10.0352
GzmA	122	E.H	10	Spleen	27.41
GzmA	122	E.H	10	Spleen	27.96	27.685	19.255		8.43		-2.732		6.64376
GzmA	123	E.H	10	Spleen	30.17
GzmA	123	E.H	10	Spleen	30.6	30.385	19.645		10.74		-0.422		1.33978
GzmA	124	C.S	14	Spleen	32.14
GzmA	124	C.S	14	Spleen	32.75	32.445	20.63		11.815		0.653		0.635957
GzmA	125	C.S	14	Spleen	32.62
GzmA	125	C.S	14	Spleen	32.21	32.415	20.015		12.4		1.238		0.42396
GzmA	126	C.S	14	Spleen	31.18
GzmA	126	C.S	14	Spleen	30.98	31.08	19.8		11.28		0.118		0.921464
GzmA	127	C.S	14	Spleen	31.02
GzmA	127	C.S	14	Spleen	31.3	31.16	20.6		10.56		-0.602		1.51782
GzmA	128	C.S	14	Spleen	31.43
GzmA	128	C.S	14	Spleen	31.43	31.43	19.51		11.92		0.758		0.591316
GzmA	129	C.H	14	Spleen	32.63
GzmA	129	C.H	14	Spleen	33.43	33.03	20.135		12.895		1.733		0.300826
GzmA	130	C.H	14	Spleen	31.87
GzmA	130	C.H	14	Spleen	32.03	31.95	19.725		12.225		1.063		0.478636
GzmA	131	C.H	14	Spleen	28.77
GzmA	131	C.H	14	Spleen	29.12	28.945	20.07		8.875		-2.287		4.8804
GzmA	132	C.H	14	Spleen	29.16
GzmA	132	C.H	14	Spleen	29.02	29.09	20.545		8.545		-2.617		6.13473
GzmA	133	C.H	14	Spleen	28.49
GzmA	133	C.H	14	Spleen	28.49	28.49	20.015		8.475		-2.687		6.43973
GzmA	134	E.S	14	Spleen	31.03
GzmA	134	E.S	14	Spleen	30.37	30.7	19.75		10.95		-0.212		1.15829
GzmA	135	E.S	14	Spleen	31.05
GzmA	135	E.S	14	Spleen	31.48	31.265	21.215		10.05		-1.112		2.16145
GzmA	136	E.S	14	Spleen	30.29
GzmA	136	E.S	14	Spleen	30.8	30.545	20.47		10.075		-1.087		2.12432
GzmA	137	E.S	14	Spleen	31.78
GzmA	137	E.S	14	Spleen	31.56	31.67	20.62		11.05		-0.112		1.08073
GzmA	138	E.S	14	Spleen	31.1
GzmA	138	E.S	14	Spleen	30.94	31.02	19.955		11.065		-0.097		1.06955
GzmA	139	E.H	14	Spleen	27.4
GzmA	139	E.H	14	Spleen	28.15	27.775	20.195		7.58		-3.582		11.9754
GzmA	140	E.H	14	Spleen	27.88
GzmA	140	E.H	14	Spleen	28.17	28.025	20.1		7.925		-3.237		9.42832
GzmA	141	E.H	14	Spleen	26.1
GzmA	141	E.H	14	Spleen	26.18	26.14	20.02		6.12		-5.042		32.9453
GzmA	142	E.H	14	Spleen	26.68
GzmA	142	E.H	14	Spleen	26.92	26.8	20.33		6.47		-4.692		25.8483
GzmA	143	E.H	14	Spleen	32.18
GzmA	143	E.H	14	Spleen	32.74	32.46	21.655		10.805		-0.357		1.28076
GzmA	145	E.H	15	Spleen	26.77
GzmA	145	E.H	15	Spleen	26.69	26.73	19.795		6.935		-4.227		18.7264
GzmA	146	E.H	15	Spleen	26.9
GzmA	146	E.H	15	Spleen	26.77	26.835	18.995		7.84		-3.322		10.0005
GzmA	147	E.H	15	Spleen	28.12
GzmA	147	E.H	15	Spleen	28.15	28.135	18.975		9.16		-2.002		4.00555
GzmA	148	E.H	15	Spleen	25.52
GzmA	148	E.H	15	Spleen	25.53	25.525	18.575		6.95		-4.212		18.5327
GzmA	153	E.H	15	Spleen	27.01
GzmA	153	E.H	15	Spleen	26.77	26.89	19.215		7.675		-3.487		11.2122
GzmA	154	E.S	15	Spleen	29.35
GzmA	154	E.S	15	Spleen	29.36	29.355	18.99		10.365		-0.797		1.73748
GzmA	155	E.S	15	Spleen	31.3
GzmA	155	E.S	15	Spleen	31.06	31.18	19.385		11.795		0.633		0.644834
GzmA	156	E.S	15	Spleen	28.65
GzmA	156	E.S	15	Spleen	29.12	28.885	19.23		9.655		-1.507		2.84218
GzmA	157	E.S	15	Spleen	30.93
GzmA	157	E.S	15	Spleen	30.81	30.87	19.675		11.195		0.033		0.977386
GzmA	158	E.S	15	Spleen	30.18
GzmA	158	E.S	15	Spleen	30.06	30.12	19.225		10.895		-0.267		1.2033
GzmA	161	C.S	15	Spleen	30.95
GzmA	161	C.S	15	Spleen	30.39	30.67	19.005		11.665		0.503		0.705638
GzmA	162	C.S	15	Spleen	31.26
GzmA	162	C.S	15	Spleen	31.06	31.16	19.02		12.14		0.978		0.507683
GzmA	163	C.S	15	Spleen	31.15
GzmA	163	C.S	15	Spleen	32.08	31.615	19.465		12.15		0.988		0.504176
GzmA	164	C.S	15	Spleen	31.4
GzmA	164	C.S	15	Spleen	31.28	31.34	19.6		11.74		0.578		0.669892
GzmA	165	C.S	15	Spleen	32.7
GzmA	165	C.S	15	Spleen	32.64	32.67	19.72		12.95		1.788		0.289573
GzmA	166	C.H	15	Spleen	29.52
GzmA	166	C.H	15	Spleen	29.1	29.31	19.36		9.95		-1.212		2.31659
GzmA	167	C.H	15	Spleen	29.92
GzmA	167	C.H	15	Spleen	30.05	29.985	19.265		10.72		-0.442		1.35849
GzmA	168	C.H	15	Spleen	30.23
GzmA	168	C.H	15	Spleen	29.98	30.105	20.545		9.56		-1.602		3.03564
GzmA	169	C.H	15	Spleen	30.08
GzmA	169	C.H	15	Spleen	30.01	30.045	21.5		8.545		-2.617		6.13473
GzmA	170	C.H	15	Spleen	27.95
GzmA	170	C.H	15	Spleen	27.88	27.915	19.095		8.82		-2.342		5.07005
GzmA	179	C.S	21	Spleen	31.27
GzmA	179	C.S	21	Spleen	30.92	31.095	19.61		11.485		0.323		0.799406
GzmA	180	C.S	21	Spleen	31.03
GzmA	180	C.S	21	Spleen	31.23	31.13	19.4		11.73		0.568		0.674551
GzmA	181	C.S	21	Spleen	32.12
GzmA	181	C.S	21	Spleen	31.72	31.92	19.81		12.11		0.948		0.518351
GzmA	182	C.S	21	Spleen	31.74
GzmA	182	C.S	21	Spleen	32.36	32.05	19.21		12.84		1.678		0.312516
GzmA	183	C.S	21	Spleen	32.02
GzmA	183	C.S	21	Spleen	31.53	31.775	20.24		11.535		0.373		0.772175
GzmA	184	C.H	21	Spleen	28.71
GzmA	184	C.H	21	Spleen	28.72	28.715	19.84		8.875		-2.287		4.8804
GzmA	185	C.H	21	Spleen	29.46
GzmA	185	C.H	21	Spleen	29.62	29.54	19.43		10.11		-1.052		2.0734
GzmA	186	C.H	21	Spleen	28.32
GzmA	186	C.H	21	Spleen	28.32	28.32	19.52		8.8		-2.362		5.14083
GzmA	187	C.H	21	Spleen	30.01
GzmA	187	C.H	21	Spleen	30.08	30.045	19.45		10.595		-0.567		1.48144
GzmA	188	C.H	21	Spleen	29.26
GzmA	188	C.H	21	Spleen	28.75	29.005	19.57		9.435		-1.727		3.31039
GzmA	189	E.S	21	Spleen	32.02
GzmA	189	E.S	21	Spleen	30.86	31.44	19.15		12.29		1.128		0.45755
GzmA	190	E.S	21	Spleen	29.78
GzmA	190	E.S	21	Spleen	29.84	29.81	18.8		11.01		-0.152		1.11111
GzmA	191	E.S	21	Spleen	31.98
GzmA	191	E.S	21	Spleen	31.15	31.565	19.58		11.985		0.823		0.565265
GzmA	192	E.S	21	Spleen	31.32
GzmA	192	E.S	21	Spleen	30.8	31.06	19.885		11.175		0.013		0.99103
GzmA	193	E.S	21	Spleen	30.39
GzmA	193	E.S	21	Spleen	30.5	30.445	20.01		10.435		-0.727		1.65519
GzmA	194	C.S	28	Spleen	31.11
GzmA	194	C.S	28	Spleen	31.39	31.25	18.6		12.65		1.488		0.356506
GzmA	195	C.S	28	Spleen	30.8
GzmA	195	C.S	28	Spleen	31.15	30.975	19.245		11.73		0.568		0.674551
GzmA	196	C.S	28	Spleen	31.86
GzmA	196	C.S	28	Spleen	31.11	31.485	19.22		12.265		1.103		0.465547
GzmA	197	C.S	28	Spleen	30.4
GzmA	197	C.S	28	Spleen	30.47	30.435	19.02		11.415		0.253		0.83915
GzmA	198	C.S	28	Spleen	29.26
GzmA	198	C.S	28	Spleen	29.22	29.24	19.43		9.81		-1.352		2.55266
GzmA	199	C.H	28	Spleen	28.37
GzmA	199	C.H	28	Spleen	28.55	28.46	19.88		8.58		-2.582		5.98769
GzmA	200	C.H	28	Spleen	29.23
GzmA	200	C.H	28	Spleen	28.84	29.035	19.475		9.56		-1.602		3.03564
GzmA	201	C.H	28	Spleen	27.56
GzmA	201	C.H	28	Spleen	27.63	27.595	19.26		8.335		-2.827		7.09597
GzmA	202	C.H	28	Spleen	29.69
GzmA	202	C.H	28	Spleen	29.78	29.735	21.715		8.02		-3.142		8.82747
GzmA	203	C.H	28	Spleen	28.08
GzmA	203	C.H	28	Spleen	27.98	28.03	19.165		8.865		-2.297		4.91435
GzmA	204	E.S	28	Spleen	29.86
GzmA	204	E.S	28	Spleen	30.4	30.13	19.445		10.685		-0.477		1.39185
GzmA	205	E.S	28	Spleen	27.24
GzmA	205	E.S	28	Spleen	27.49	27.365	18.88		8.485		-2.677		6.39525
GzmA	206	E.S	28	Spleen	30.64
GzmA	206	E.S	28	Spleen	31.37	31.005	19.33		11.675		0.513		0.700764
GzmA	207	E.S	28	Spleen	28.34
GzmA	207	E.S	28	Spleen	28.53	28.435	19.415		9.02		-2.142		4.41373
GzmA	208	E.S	28	Spleen	29.79
GzmA	208	E.S	28	Spleen	29.36	29.575	19.885		9.69		-1.472		2.77406
